# Supplementary material for: Musa balbisiana genome reveals subgenome evolution and functional divergence
Source: PubMed Central journal article supplement (PMC6784884; doi:10.1038/s41477-019-0452-6), 2019-07-15
Supplement: 41477_2019_452_MOESM1_ESM.pdf [file 41477_2019_452_MOESM1_ESM.pdf]

In the format provided by the authors and unedited.

# *Musa balbisiana* genome reveals subgenome evolution and functional divergence

Zhuo Wang<sup>1,12</sup>, Hongxia Miao<sup>1,12</sup>, Juhua Liu<sup>1,2,12</sup>, Biyu Xu<sup>1,12</sup>, Xiaoming Yao<sup>3,12</sup>, Chunyan Xu<sup>3,12</sup>, Shancen Zhao<sup>4</sup>, Xiaodong Fang<sup>3</sup>, Caihong Jia<sup>1</sup>, Jingyi Wang<sup>1</sup>, Jianbin Zhang<sup>1</sup>, Jingyang Li<sup>2</sup>, Yi Xu<sup>2</sup>, Jiashui Wang<sup>2</sup>, Weihong Ma<sup>2</sup>, Zhangyan Wu<sup>3</sup>, Lili Yu<sup>3</sup>, Yulan Yang<sup>3</sup>, Chun Liu<sup>3</sup>, Yu Guo<sup>3</sup>, Silong Sun<sup>3</sup>, Franc-Christophe Baurens<sup>5,6</sup>, Guillaume Martin <sup>5,6</sup>, Frederic Salmon<sup>6,7</sup>, Olivier Garsmeur<sup>5,6</sup>, Nabila Yahiaoui<sup>5,6</sup>, Catherine Hervouet<sup>5,6</sup>, Mathieu Rouard <sup>8</sup>, Nathalie Laboureau<sup>9,10</sup>, Remy Habas<sup>9,10</sup>, Sebastien Ricci<sup>6,7</sup>, Ming Peng<sup>1</sup>, Anping Guo<sup>1</sup>, Jianghui Xie<sup>1</sup>, Yin Li <sup>11</sup>, Zehong Ding<sup>1</sup>, Yan Yan<sup>1</sup>, Weiwei Tie<sup>1</sup>, Angélique D'Hont <sup>5,6\*</sup>, Wei Hu <sup>1\*</sup> and Zhiqiang Jin <sup>1,2\*</sup>

<sup>1</sup>Key Laboratory of Biology and Genetic Resources of Tropical Crops, Institute of Tropical Bioscience and Biotechnology, Chinese Academy of Tropical Agricultural Sciences, Haikou, China. <sup>2</sup>Key Laboratory of Genetic Improvement of Bananas, Hainan province, Haikou Experimental Station, China Academy of Tropical Agricultural Sciences, Haikou, China. <sup>3</sup>BGI Genomics, BGI-Shenzhen, Shenzhen, China. <sup>4</sup>BGI Institute of Applied Agriculture, BGI-Shenzhen, Shenzhen, China. <sup>5</sup>CIRAD, UMR AGAP, Montpellier, France. <sup>6</sup>AGAP, Univ Montpellier, CIRAD, INRA, Montpellier SupAgro, Montpellier, France. <sup>7</sup>CIRAD, UMR AGAP, Guadeloupe, France. <sup>8</sup>Bioversity International, Montpellier, France. <sup>9</sup>CIRAD, UMR BGPI, Montpellier, France. <sup>10</sup>BGPI, CIRAD, INRA, Montpellier SupAgro, Montpellier, France. <sup>11</sup>Waksman Institute of Microbiology, Rutgers, The State University of New Jersey, Piscataway, NJ, USA. <sup>12</sup>These authors contributed equally: Zhuo Wang, Hongxia Miao, Juhua Liu, Biyu Xu, Xiaoming Yao, Chunyan Xu. \*e-mail: [dhont@cirad.fr](mailto:dhont@cirad.fr); [huwei2010916@126.com](mailto:huwei2010916@126.com); [18689846976@163.com](mailto:18689846976@163.com)

---

# Supplementary Information

## 1. Genome assembly

### 1.1 Sample collection

A double haploid (DH) of the wild diploid genotype Pisang Klutuk Wulung (PKW;  $2n=2x=22$ ) was provided by the centre de coopération internationale en recherche agronomique pour le développement (CIRAD) for genome sequencing. Pisang Klutuk Wulung (PKW) is a wild *Musa balbisiana* accession collected in 1985 in Indonesia and conserved in the field collection of the CRB Plantes Tropicales Antilles CIRAD-INRA Guadeloupe (French West Indies) under accession code PT-BA-00302 and as *in vitro* plantlets at the Bioversity's International Transit Center (ITC) hosted by the Katholieke Universiteit Leuven in Belgium, under the accession code ITC1587. The DH-PKW was obtained in Guadeloupe through anther culture and spontaneous chromosomes doubling<sup>10,91</sup> and is conserved in the CIRAD field collection in Guadeloupe. Its homozygous status was verified with SSR markers and endogenous Banana Streak Virus PCR based genotyping<sup>92</sup>.

Plants were grown in a greenhouse where the minimum and maximum temperatures were 25°C and 30°C, respectively. Fresh unexpanded leaves were harvested, and then frozen immediately with liquid nitrogen in order to preserve genomic DNA for isolation. High molecular weight genomic DNA was extracted using a standard cetyltrimethyl ammonium bromide (CTAB) method<sup>62</sup>. DNA integrity was assessed by agarose gel electrophoresis (concentration of agarose gel: 1%,

---

22 voltage: 150 V, electrophoresis time: 40 min). Finally, DNA was purified from the gel  
23 using a QIAquick Gel Extraction kit (QIAGEN, Shanghai, China).

## 24 **1.2 Library construction and sequencing**

25 DNA was extracted from DH-PKW leaves using a standard CTAB extraction<sup>62</sup>.  
26 We used a whole genome shotgun strategy and next-generation sequencing based on  
27 Illumina HiSeq 2000 platform. In order to reduce the risk of non-randomness, we  
28 constructed one paired-end and eight mate-pair libraries with insert sizes of 500 bp, 2  
29 kb, 5 kb, 10 kb, and 20 kb. To reduce the effect of sequencing error, we stringently  
30 filtered reads by removing reads meeting the following criteria:

31 Type (1): Reads with  $\geq 10\%$  and  $\geq 3\%$  unidentified nucleotides for short and long  
32 insert size libraries, respectively.

33 Type (2): Reads from short-insert libraries having more than 40% of bases with  
34 quality score less than 7, and reads from long-insert libraries that contained more than  
35 20% bases with quality scores less than 7.

36 Type (3): Reads with  $> 10$  bp aligned to the adapter sequence, while allowing  $\leq 2$   
37 bp mismatches.

38 Type (4): Small paired-end reads in short-insert libraries that overlapped by more  
39 than 10 bp with the corresponding paired end.

40 Type (5): Read 1 and read 2 of two paired-end reads that were completely  
41 identical (considered to be PCR duplication products).

42 Following the above quality control and filtering steps, 86.34 Gb (166x coverage)  
43 of sequencing data was retained for assembly (Supplementary Table 1).

---

44 For PacBio sequencing, SMRT libraries were constructed using the PacBio 20-kb  
45 protocol (<https://www.pacb.com/>). Six SMRT cells were loaded and 5.79 million long  
46 reads were produced of 20-kb insert size libraries. A total of 58.99 Gb data was  
47 generated by PacBio Sequel system (Supplementary Table 1). The subreads have a  
48 mean length of 10.2 kb and N50 length of 16.6 kb, with 98.83% of the raw data with  
49 length > 1 kb.

50 For Hi-C sequencing, leaves of HD-PKW were collected and cut into 5mm ×  
51 5mm pieces. It was soaked into 18% formaldehyde for 5 minutes, then soaked into  
52 2% formaldehyde for 30 minutes, and kept 30 minutes on ice after adding 2M glycine  
53 solution. Finally rinsed twice with sterile distilled water and frozen into liquid  
54 Nitrogen. Hi-C library were prepared using the method described by  
55 Lieberman-Aiden et al.<sup>63</sup>. We constructed a Hi-C library with DNA fragment from  
56 300 to 700bp and sequenced on Illumina NovaSeq 6000 platform. After filtering  
57 adapter contamination and low quality reads, we got 71.96 Gb (138 × coverage) clean  
58 data (Supplementary Table 1).

### 59 **1.3 Estimation of genome size using k-mer analysis**

60 K-mers are artificial sequences with K nucleotide length. A raw sequence read  
61 with L bp contains (L-K+1) K-mers, if the length of each K-mer is K bp. The  
62 frequency of each K-mer can be calculated from the sequence reads. Typically, K-mer  
63 frequencies that are plotted against the sequence depth follow a Poisson distribution in  
64 any given dataset. However, sequencing errors may lead to higher representation of  
65 K-mers at low frequencies. The genome size can be calculated from the formula

---

66  $G=K\_num/K\_depth$ , where  $K\_num$  is the total number of  $K$ -mers, and  $K\_depth$   
67 denotes the  $K$ -mer frequency occurring more than other frequencies. Here, we used a  
68  $K$  of 17 and  $K\_num$  of 25,507,921,320, and  $K\_depth$  of 49. We thus estimated the  
69 genome size to be 520.57 Mb (Supplementary Fig. 1).

#### 70 **1.4 Genome assembly**

71 *De novo* assembly of the B-genome was performed using wtdbg (version 1.2.8,  
72 <https://github.com/ruanjue/wtdbg>) based on  $\sim 113\times$  PacBio data (only reads longer  
73 than 1 kb were used in the assembly), the following parameters were used: -t 20  
74 --tidy-reads 5000 -k 0 -p 19 -S 1 --rescue-low-cov-edges. The assembled genome was  
75 first corrected for two rounds using “wtdbg-cns” program implemented in wtdbg  
76 package. Then we used algorithm Arrow  
77 (<https://github.com/PacificBiosciences/GenomicConsensus>), which takes into account  
78 all of the underlying data and the raw quality values inherent in SMRT sequencing, to  
79 polish the assembly again for the final consensus accuracies. Further scaffolding was  
80 performed by SSPACE v3.0 program<sup>64</sup> using meta-pair reads from libraries of 2 kb to  
81 20 kb insert-size. The total scaffold size was 492.76 Mb and the N50 (50% of the  
82 genome in fragments of this length or longer) was 5.05 Mb. The total contig size was  
83 491.47 Mb, and the N50 was 1.83 Mb (Supplementary Table 2).

84 The quality and completeness of our assemblies were assessed in several ways.  
85 BUSCO<sup>11</sup> (version 3) was used to assess assembly completeness by mapping 1,440  
86 conserved plant orthologous genes to the assembled genome and 1,312 (91.1%) can  
87 be completely found in our assembly. Then, 29,610 banana-expressed sequence tags

---

88 (ESTs) available in the NCBI dbEST database (<http://www.ncbi.nlm.nih.gov/dbEST/>)  
89 were used to map the assembled genome using BLAT<sup>65</sup>, and 93.59% were aligned to  
90 the assembly with at least 90% identity. Additionally, 59 × Illumina reads generated  
91 from the 500 bp insert size libraries were mapped onto the assembly using BWA<sup>66</sup>  
92 (version 0.7.12, parameters: aln -l 35), and 96.11% of the data could be mapped on the  
93 assembly.

#### 94 **1.5 Pseudomolecules construction**

95 Hi-C technology enables the generation of genome-wide 3D proximity maps and  
96 is an efficient strategy for sequences cluster, ordered, and orientation for  
97 pseudomolecule construction<sup>13</sup>. The 138.38 × clean Hi-C reads were first truncated at  
98 the putative Hi-C junctions and then the resulting trimmed reads were aligned to the  
99 assembly with BWA aligner<sup>66</sup> (version 0.7.12) with default parameters. 94.54% of the  
100 trimmed reads were mapped on the assembly. Only uniquely aligned pairs reads  
101 whose mapping quality more than 20 were remained for further analysis. Invalid read  
102 pairs, including Dangling-End and Self-cycle, Re-ligation and Dumped products,  
103 were filtered by HiC-Pro (version 2.8.1)<sup>12</sup>. Finally, we got 169.7 Mb (70.61%)  
104 uniquely mapped read pairs. Then scaffolds were cut into 200 kb windows for  
105 correcting the potential scaffolding error using Hi-C valid read pairs. 84.82% of  
106 uniquely mapped read pairs were valid interaction pairs and they were used for  
107 clustered, ordered and orientated scaffolds onto chromosomes by LACHESIS  
108 software<sup>13</sup> with the following parameters:

109 CLUSTER\_MIN\_RE\_SITES = 73;

---

110 CLUSTER\_MAX\_LINK\_DENSITY=3;  
111 CLUSTER\_NONINFORMATIVE\_RATIO = 1.5;  
112 ORDER\_MIN\_N\_RES\_IN\_TRUN=15;  
113 ORDER\_MIN\_N\_RES\_IN\_SHREDS=15.

114 Finally, 294 scaffolds (total size was 430.02 Mb) were anchored on 11  
115 pseudomolecules (Supplementary Fig. 2 and Supplementary Table 3). The  
116 chromosomes were named according to the linkage group nomenclature adopted in *M.*  
117 *acuminata*.

## 118 **2. Genome annotation**

### 119 **2.1 Repeat annotation**

120 Transposable elements (TE) in *M. balbisiana* were identified by a combination of  
121 homology-based and *de novo* approaches. Firstly, the homology-based approach with  
122 RepeatMasker (version 4.0.6)<sup>93</sup> and RepeatProteinMask was used to search Repbase  
123 (release 21.01)<sup>94</sup>, a database of known DNA/protein TEs. Secondly, an *ab initio* repeat  
124 library, which combined Piler (version 1.0)<sup>95</sup>, RepeatScout (version 1.0.5)<sup>96</sup>, and  
125 LTR-FINDER (version 1.0.5)<sup>97</sup>, were employed to build the *de novo* repeat library of  
126 B-genome. Then we used RepeatMasker<sup>93</sup> (Version 4.0.6) to identify repeat elements  
127 based on the *de novo* repeat database. The tandem repeats were annotated using  
128 Tandem Repeats Finder (version 4.09)<sup>98</sup>. Lastly, the redundancy between the two  
129 methods was eliminated in order to generate combined data (Supplementary Table 4).  
130 The most abundant repeat grouping was the Long Terminal Repeat retroelements  
131 (LTR), which represented 46.06% of the genome. LINEs were quite underrepresented,

---

132 and totally just 1.30% of the genome. DNA transposable elements constituted 2.12%  
133 of the B-genome. In addition, 4.94% of the genome was classified as repetitive, but  
134 could not be further characterized. The same approaches and parameters were used to  
135 annotate TEs in *M. acuminata* (A-genome) (Supplementary Table 4).

136 To infer the insertion time of LTR retrotransposon, full-length LTR  
137 retrotransposons were identified using LTRharvest<sup>99</sup> and LTRdigest<sup>100</sup> included in  
138 Genome Tools (version 1.5.8) analysis system<sup>101</sup>. Timing of insertion was based on  
139 the divergence of the 5' and 3' LTR sequences of each copy<sup>102</sup>. The 5' and 3' LTRs  
140 were aligned using MUSCLE (version 3.8.31)<sup>81</sup>, and the substitutions per nucleotide  
141 site were calculated by a custom script. The insertion time was estimated using an  
142 average base substitution rate of 1.3E-8<sup>103</sup>. The timing of insertion indicates a very  
143 recent wave of LTR retrotransposon amplification (the highest peak at 0-0.5 MYA) in  
144 *M. balbisiana* (Supplementary Fig. 3).

## 145 **2.2 Gene structure annotation**

146 Identification of protein-coding genes involved homolog-based prediction, *de*  
147 *novo* predictions, and the use of RNA-Seq data as follows.

148 (1) Homolog-based prediction. Homologous proteins of *M. acuminata* (DH  
149 Pahang v2), *A. thaliana* (TAIR10), *Z. mays* (B73, v4), *B. distachyon* (v3.0) and *S.*  
150 *bicolor* (Ensembl release-41) were aligned to the B-genome using TblastN with an  
151 E-value cutoff of 1e-5. The aligned sequences, and their corresponding query proteins  
152 were then filtered and passed to Exonerate (version 2.2.0, parameters: --model  
153 protein2genome -percent 20 -minintron 10, -maxintron 50000)<sup>104</sup> to search for



---

154 accurate spliced alignments.

155 (2) *De novo* gene prediction. *De novo* prediction was performed on the  
156 transposons-masked genome. Augustus (version 3.2.1)<sup>105</sup> and SNAP (version  
157 2006-07-28)<sup>106</sup> with training model parameters of B-genome were used to predict  
158 coding genes.

159 (3) RNA-Seq assist prediction. Six transcriptome data from *M. balbisiana* were  
160 sequenced. The RNA-seq reads were mapped to B-genome using HISAT2 (version  
161 2.0.1-beta; parameters: -max-intronlen 160000 -no-discordant -no-mixed)<sup>107</sup>, and the  
162 alignments results were assembled by StringTie (version 1.2.1)<sup>108</sup> with default  
163 parameters to obtain the reference-based gene structures. In order to get the more  
164 perfect alignments, the splice sites were validated and transcripts were assembled  
165 again into gene structures by PASA\_lite software  
166 ([https://github.com/PASAPipeline/PASA\\_Lite](https://github.com/PASAPipeline/PASA_Lite)).

167 (4) Integration of final consensus gene set. Final integrated gene models were  
168 derived from MAKER<sup>15</sup> (version 3.31.8) with upper Augustus and SNAP *de novo*  
169 prediction, five protein-based homolog predicted gene structures, and RNA-Seq based  
170 transcripts structures. Finally, the *M. balbisiana* gene set contains 35,148 genes with  
171 an average gene length of 5 kb (Supplementary Table 5).

172 Genome annotation completeness was assessed using BUSCO v3<sup>11</sup> with the  
173 embryophyta database of 1,440 single copy orthologs, and 94% (1,348) of  
174 orthologous genes are completely found in our gene sets.

### 175 **2.3 Gene function annotation**

---

176 Gene functions were annotated according to the best match of the alignments  
177 using BLAST (version 2.2.26, parameters: -p blastp, -e 1e-05 -b 5 -v 5)<sup>67</sup> against the  
178 Swiss-Prot<sup>68</sup>, TrEMBL (Uniprot release 2018\_07)<sup>68</sup>, KOG (release 20090331)<sup>69</sup> and  
179 NR database (release 20170924). Protein motifs and domains were determined by  
180 InterProScan (version 5.16)<sup>109</sup> against publicly available databases such as PANTHER  
181 (<http://www.pantherdb.org/>), Gene3D<sup>110</sup>, SUPERFAMILY<sup>111</sup>, Pfam<sup>112</sup>, SMART<sup>113</sup>,  
182 and PROSITE<sup>114</sup>. Gene Ontology<sup>115</sup> functional information was retrieved from NR by  
183 converting NR accession ID to GO terms. We also mapped all proteins to KEGG  
184 orthologs (Release 87)<sup>70</sup> using balstp (-e 1e-5 -b 5 -v 5) to find the best hit for each  
185 gene. Totally, 92% of the genes had assigned function annotation.

## 186 **2.4 ncRNA annotation**

187 Four types of non-coding RNAs were detected in the whole genome. tRNAs  
188 were predicted by tRNAscan-SE (version 1.23)<sup>116</sup> with eukaryote parameters. The  
189 miRNAs and snRNAs were predicted using INFERNAL<sup>117</sup> software by searching  
190 against the Rfam database (Release 12.0)<sup>118</sup>. rRNAs were identified by aligning to the  
191 template rRNA (5S, 5.8S, 18S rRNA from *Arabidopsis thaliana* and 28S from rice) to  
192 assembled genome using blastn (version 2.2.26)<sup>67</sup> with *E*-value <1e-5. The annotation  
193 predicted 9,134 non-coding RNAs (Supplementary Table 52).

## 194 **3. Genome evolution**

### 195 **3.1 Genome data used in evolutionary analysis**

196 The gene sets of the fifteen species were downloaded: *A. thaliana* (TAIR10), *B.*  
197 *distachyon* (v3.1), *A. officinalis* (v1.1), *A. comosus* (JGI\_v13), *E. guineensis* (v5), *M.*

---

198 *acuminata* (DH Pahang v2), *O. sativa* (IRGSP-1.0), *P. trichocarpa* (JGI\_v13), *S.*  
199 *bicolor* (JGI\_v13), *Z. mays* (B73, v4), *P. equestris* (NCBI), *S. polyrhiza* (JGI\_v13), *V.*  
200 *vinifera* (Genoscope), *S. lycopersicum* (ITAG3.2) and *A. trichopoda* (AMTR1.0). The  
201 gene sets were used for gene clustering, phylogenetic reconstructions, divergence time  
202 estimations, and identification of chromosome collinearity, among other analyses. All  
203 gene sets were processed and filtered using the following criteria:

- 204 1) Removal of genes when internal stop codons were present in the CDS.
- 205 2) Genes were retained with the longest alternative splicing sites.
- 206 3) Mixed bases were recoded to NNN for the codon, and the corresponding  
207 protein was coded to X.

### 208 **3.2 Gene clustering by OrthoMCL**

209 In total, 500,142 genes from above plants were used for gene family clustering  
210 analysis. First, blastp<sup>67</sup> all-by-all (version 2.2.26) was used to generate pairwise  
211 protein sequence alignments with E-value less than 1e-5. Second, OrthoMCL (Version  
212 1.4)<sup>22</sup> was used to cluster similar genes by setting the main inflation value at 1.5 and  
213 using the default settings for other parameters. In total, 39,358 gene families  
214 comprising 393,700 genes from nine species were generated (Supplementary Table 7  
215 and Supplementary Figs. 7-8).

### 216 **3.3 Phylogenetic analyses**

217 The 519 single-copy orthologous genes shared for the sixteen species were used  
218 to construct a phylogenetic tree. The protein sequence from all single-copy  
219 orthologous genes were aligned using MUSCLE<sup>81</sup>. The alignments were then changed

---

220 to nucleotide sequence using each gene's corresponding CDS sequence. Each amino  
221 acid was substituted to the corresponding triplet bases from its CDS according to the  
222 same ID information using a custom Perl script, and for the gap (-) in protein  
223 alignment, one gap (-) will be substituted into 3 gaps (---). We extracted four-fold  
224 degenerate (4d) sites and phase 1 sites of all single-copy orthologous genes in each  
225 species, and concatenated them to one super-gene for phylogeny construction  
226 separately. We constructed a phylogenetic tree using MrBayes (version 3.1.2)<sup>75</sup>  
227 software with GTR model (Supplementary Fig. 3).

228 We further estimated the divergence time for sixteen species based on 4 d sites of  
229 all single-copy orthologous genes. Markov chain Monte Carlo algorithm for Bayes  
230 estimation was adopted to estimate the neutral evolutionary rate and species  
231 divergence time using the program MCMC Tree with JC69 model of the PAML  
232 package<sup>76</sup>. The following constraints were used for time calibrations: (i) the *O. sativa*  
233 and *B. distachyon* divergence time (40-53 million years ago (MYA))<sup>119</sup>; (ii) the *P.*  
234 *trichocarpa* and *A. thaliana* divergence time (100-120 MYA)<sup>120</sup>; and (iii) 200 MYA as  
235 the upper boundary for the earliest-diverging angiosperms<sup>121</sup>. The estimated  
236 divergence time between *M. acuminata* and *M. balbisiana* was 5.4 MYA (1.8-13.3  
237 MYA) (Supplementary Fig. 5).

### 238 **3.4 Expansion and contraction of gene families**

239 Based on the identified gene families and the constructed phylogenetic tree with  
240 predicted divergence time of the 16 species, we used CAFÉ software (v2.1)<sup>23</sup> to  
241 analyze gene families' expansion and contraction (Supplementary Fig. 9). First,

---

242 families with too much change in size were discarded (families with gene number  $\geq$   
243 200 in one species and  $\leq 2$  in all other species), then families with most recent  
244 common ancestor (MRCA) size equal to 0 predicted by parsimony method were also  
245 filtered.

246 In CAFÉ, a random birth and death model is proposed to study gene gain or loss  
247 in gene families across a specified phylogenetic tree. Branch length values  
248 represented the divergence time. The global parameter  $\lambda$  (lambda), which describe  
249 both the gene birth ( $\lambda$ ) and death ( $\mu = -\lambda$ ) rate across all branches in tree for all gene  
250 families was estimated using maximum likelihood method. Then, conditional  $p$ -value  
251 was calculated for each gene family, and family with conditional  $p$ -value less than  
252 0.01 was considered to have an accelerated rate for gene gain or loss.

253 Finally, we predicted a total of 11,499 MRCA families. There are 1,761 gene  
254 families that expanded in A-genome and 392 expanded in B genome. We analyzed if  
255 they are tandem duplication in one genome or gene loss in another genome. We first  
256 checked the 1,761 families expanded in A-genome in detail, and we found: (1) 245  
257 families contain tandem duplication genes (totally contain 776 tandem duplication  
258 genes; criteria of tandem duplication:  $e$ -values  $< 1e-20$  and identity  $> 40\%$ , with a  
259 maximum of five intervening genes); (2) 360 gene families are contraction (gene loss)  
260 in B-genome compared with their common ancestor; (3) except for the 360 families,  
261 the rest of the 1,401 families are no size change in B-genome. Among the rest of  
262 1,401 families, 1,255 families in A-genome have one more gene than B-genome, and  
263 143 families have two more genes than B genomes. Totally, 14% of the expansion

---

264 families in A-genome have tandem duplication, and 20% families are gene loss in  
265 B-genome. And among the 1,401 families, 99.9% (1,398) has one or two more genes  
266 than B genome. The total statistics of the 1,761 expanded families in *M. acuminata*  
267 and 392 expanded families in *M. balbisiana* was summarized in Supplementary  
268 Tables 8-9.

269 To further analyze the similarity of those genes in the 1,401 families (contain  
270 4,740 genes) that expanded in A-genome but no size change in B-genome and the 332  
271 families (contain 1,202 genes) that expanded in B-genome but no size change in  
272 A-genome, we did all-versus-all blastp ( $E$  value  $< 1e-5$ ) alignment of all those genes  
273 from A- and B-genome. Based on the blast results, we calculated the CIP value  
274 (Cumulative Identity Percentage - Sum of all HSPs' identity sequence divided by the  
275 cumulative aligned length)<sup>35,36</sup> of each gene pair to evaluate the sequence similarity. For  
276 genes in each same family, we calculated three groups of CIP: (1) CIP of all gene-pairs  
277 in A-genome, (2) CIP of all gene-pairs in B-genome, and (3) CIP of all gene-pairs  
278 between A- and B-genomes. Then, we calculated the average CIP of the upper three  
279 sets. Finally, for 1,401 families (expanded in A-genome but no size change in  
280 B-genome), the average CIP of gene-pairs in A-genome (CIP\_A), B-genome (CIP\_B)  
281 and between A- and B-genomes (CIP\_A vs B) are 71.76, 70.13 and 76.97, respectively.  
282 For 332 families (expanded in B-genome but no size change in A-genome), the average  
283 CIP of CIP\_A, CIP\_B and CIP\_A vs B are 71.14, 68.32 and 75.58, respectively  
284 (Supplementary Tables 8-9). According to this result, the genes' similarity between A-  
285 and B-genomes is higher than that in themselves.

---

286 The significantly expanded gene families in B-genome ( $p$ -value  $\leq 0.05$ ) were  
287 mapped to KEGG pathways<sup>70</sup> for further functional enrichment analysis  
288 (Supplementary Table 10). The KEGG pathway enrichment analysis was conducted  
289 using the enrichment methods<sup>77</sup>, which implemented hypergeometric test algorithms  
290 and the Q-value (FDR, False Discovery Rate) was calculated to adjust the p-value  
291 using R package (<https://github.com/StoreyLab/qvalue>).

### 292 **3.5 Genome duplication analysis**

293 The all-versus-all blastp<sup>67</sup> method (version 2.2.26,  $E$ -value $<1e-5$ ) was used to  
294 detect paralogous genes in *M. acuminata*, *M. balbisiana* and *A. thaliana* as well as  
295 orthologous genes in *M. acuminata*-*M. balbisiana*, *M. acuminata*-*A. thaliana* and *M.*  
296 *balbisiana*-*A. thaliana*. Syntenic blocks were detected using MCSCAN (parameters:  
297 -a -e 1e-5 -s 5)<sup>78</sup>. We extracted all the paralogous and orthologous gene pairs from  
298 syntenic blocks in those species to further calculate the 4dTv<sup>79</sup> distances using the  
299 HKY substitution model<sup>80</sup>. The distribution of 4dTv (Supplementary Fig. 6)  
300 confirmed the banana shared recent and ancient WGD.

### 301 **4. Analysis of homoeologous exchanges**

302 Assessment of read coverage depth was used to detect homoeologous exchanges  
303 (HEs) between A- and B- subgenome<sup>34</sup>. We detected the HEs in three triploids  
304 FenJiao (ABB), Pelipita (ABB), and Kamaramasenge (AAB). The uniquely mapped  
305 Illumina paired-end reads (Supplementary Table 14) were used to calculate the  
306 coverage depth of each samples on A- and B-genome (Supplementary Figs. 25-27).  
307 Suppose “A-Cov” represents the coverage peak on A-genome and “B-Cov” represents

---

308 the coverage peaks on B-genome of three triploids. For example, “A-Cov” and  
309 “B-Cov” of FenJiao were 8 and 19 respectively (Supplementary Fig. 25). We  
310 calculated the average depth on each 10 kb windows. For ABB group, windows with  
311 depth  $\geq$  “A-Cov + B-Cov” in B-genome and depth  $\geq$  “A-Cov+B-Cov/2” in  
312 A-genome were considered as duplicated windows. For AAB group, the same  
313 principle (B-genome depth  $\geq$  “A-Cov/2 + B-Cov”; A-genome depth  $\geq$   
314 “A-Cov+B-Cov”) was used to detect the duplicated window. Adjacent duplicated  
315 windows that were at most 5 windows distant were linked together. Only regions  
316 spanning more than 8 windows (80 kb) were retained. Totally, we initially identified  
317 263 regions which coverage depth was high than the corresponding threshold on one  
318 parents. Then, based on the homoeologous regions on chromosomes that were defined  
319 by syntenic blocks, we confirmed a total of 161 segments where the orthologous  
320 region can be found in the other parental genome with at least 50% orthologous gene  
321 pairs existing in syntenic blocks. We found Chr10 of B-genome in Kamaramasenge  
322 and Chr02, Chr07 and Chr11 of A-genome in Pelipita were almost entirely replaced  
323 by the corresponding homoeologous chromosomes (Fig. 2). Among the 161 segments,  
324 91 are located on these four chromosomes. Excluding these 4 chromosomes, we  
325 identified 48 segmental HEs in FenJiao (ABB), 18 in Pelipita (ABB) and 4 in  
326 Kamaramasenge (AAB) (Supplementary Table 15).

## 327 **5. Transcriptome analysis**

### 328 **5.1 Plant materials and treatments**

329 Two cultivated varieties of BaXiJiao (*Musa acuminata* L. AAA group cv. BaXi



---

330 Jiao; hereafter referred to as BX) and FenJiao (*Musa* ABB Pisang Awak, ITC0213;  
331 hereafter referred to as FJ) were used for transcriptomic analysis. Banana fruits at  
332 different stages of development, including at 0 days after flower (DAF), 20 DAF,  
333 and 80 DAF (0 day post-harvest: 0 DPH), were obtained from the banana plantation  
334 at the Institute of Tropical Bioscience and Biotechnology (Chengmai, Hainan, 20 N,  
335 110 E). The degree of ripening in the postharvest ripening process can be divided  
336 into the following seven stages according to Pua et al.<sup>122</sup>: full green (FG), trace  
337 yellow (TY), more green than yellow (MG), more yellow than green (MY), green  
338 tip (GT), full yellow (FY), and yellow flecked with brown spots (YB). Fruits at 8  
339 and 14 DPH in BX reached MG and FY stages, respectively, whereas those of 3 and  
340 6 DPH in FJ reached MG and FY stages, respectively. The fruit samples (0 DAF, 20  
341 DAF, 80 DAF, 8 DPH and 14 DPH for BX; 0 DAF, 20 DAF, 80 DAF, 3 DPH and 6  
342 DPH for FJ) were frozen in liquid nitrogen and stored at -80°C until RNA  
343 extraction was conducted for transcriptome analysis. Two-month-old banana  
344 seedlings of BX and FJ were obtained from the Tissue Culture Center of CATAS.  
345 Banana seedlings at five leaves stage were treated with 200 mM mannitol for 7 days,  
346 300 mM NaCl for 7 days, and low temperature conditions (4°C) for 22 hours. The  
347 leaves were sampled for transcriptome analysis. The leaves and roots sampled from  
348 banana seedlings at five leaves stage cultured in Hoagland's solution were used as  
349 control.

## 350 **5.2 RNA-Seq sequencing and expression analysis**

351 Total RNA was isolated using a plant RNA extraction kit (TIANGEN, Beijing,

---

352 China). Three  $\mu\text{g}$  of total RNA from each sample was converted to cDNA using a  
353 RevertAid First-Strand cDNA Synthesis Kit (Fermentas, Beijing, China). cDNA  
354 libraries were constructed using TruSeq RNA Library Preparation Kit v2, and were  
355 subsequently sequenced on the Illumina HiSeq 2000 platform using the Illumina  
356 RNA-seq protocol. Two biological replicates were used for each sample.

357 Paired end reads with 90-bp were produced on HiSeq 2000 platform of all  
358 samples. A total of 159.14 Gb of high-quality clean data was produced  
359 (Supplementary Table 21) and aligned using SOAPaligner/SOAP2 version 2.21 with  
360 parameters “-m 0 -x 1000 -s 40 -l 32 -v 5 -r 1 -p 3”<sup>123</sup>. Clean reads of FJ samples were  
361 simultaneously aligned to the A- and B-genome, and clean reads of BX samples were  
362 mapped to A-genome (*M. acuminata*). Gene expression levels were calculated as  
363 RPKM<sup>76</sup>. Differentially expressed genes were identified by the methods established  
364 by Audic et al. (1997) with the read count of two replicates for each gene (fold change  
365  $\geq 2$ ;  $\text{FDR} \leq 0.001$ )<sup>87</sup>. For homoeolog gene pairs, the genes that dominantly expressed  
366 in A-subgenome must meet: (1) the genes in A-subgenome showed upregulation  
367 (Log2 based RPKM>1) at least in 6 samples relative to their homoeologs in  
368 B-subgenome; (2) their homoeologs in B-subgenome did not show upregulation  
369 (Log2 based RPKM>1) relative to the genes in A-subgenome in the rest of samples.  
370 The genes that dominantly expressed in B-subgenome must meet: (1) the genes in  
371 B-subgenome showed upregulation (Log2 based RPKM > 1) at least in 6 samples  
372 relative to their homoeologs in A-subgenome; (2) their homoeologs in A-subgenome  
373 did not show upregulation (Log2 based RPKM > 1) relative to the genes in

---

374 B-subgenome in the rest of samples.

375

376 **6. References**

377 91. Bakry, F., Assani, A., & Kerbellec, F. Haploid induction: androgenesis in  
378 *Musa balbisiana*. *Fruit* **63**, 45-49 (2008).

379 92. UMBER, M. et al. Marker-assisted breeding of *Musa balbisiana* genitors  
380 devoid of infectious endogenous Banana streak virus sequences. *Mol. Breeding* **36**, 74  
381 (2016).

382 93. Chen, N. Using RepeatMasker to identify repetitive elements in genomic  
383 sequences. *Curr. Protoc. Bioinformatics* **25**, 4-10 (2004).

384 94. Jurka, J. et al. Repbase Update, a database of eukaryotic repetitive elements.  
385 *Cytogenet. Genome Res.* **110**, 462-467 (2005).

386 95. Edgar, R. C., & Myers, E. W. PILER: identification and classification of  
387 genomic repeats. *Bioinformatics* **21**, i152-i158 (2005).

388 96. Price, A. L., Jones, N. C., & Pevzner, P. A. *De novo* identification of repeat  
389 families in large genomes. *Bioinformatics* **21**, i351-i358 (2005).

390 97. Xu, Z., & Wang, H. LTR\_FINDER: an efficient tool for the prediction of  
391 full-length LTR retrotransposons. *Nucleic Acids Res.* **35**, W265-W268 (2007).

392 98. Benson, G. Tandem repeats finder: a program to analyze DNA sequences.  
393 *Nucleic Acids Res.* **27**, 573 (1999).

394 99. Ellinghaus, D., Kurtz, S., & Willhoeft, U. LTRharvest, an efficient and  
395 flexible software for *de novo* detection of LTR retrotransposons. *BMC Bioinformatics*

---

396 **9**, 18 (2008).

397 100. Steinbiss, S. et al. Fine-grained annotation and classification of de novo  
398 predicted LTR retrotransposons. *Nucleic Acids Res.* **37**, 7002-7013 (2009).

399 101. Gremme, G., Steinbiss, S., & Kurtz, S. GenomeTools: a comprehensive  
400 software library for efficient processing of structured genome annotations. *IEEE/ACM*  
401 *Transactions on Computational Biology and Bioinformatics (TCBB)* **10**, 645-656  
402 (2013).

403 102. SanMiguel, P. et al. Nested retrotransposons in the intergenic regions of the  
404 maize genome. *Science* **274**, 765-768 (1996).

405 103. Ma, J., & Bennetzen, J. L. Rapid recent growth and divergence of rice  
406 nuclear genomes. *Proc. Natl. Acad. Sci. USA* **101**, 12404-12410 (2004).

407 104. Slater, G. S. C., & Birney, E. Automated generation of heuristics for  
408 biological sequence comparison. *BMC Bioinformatics* **6**, 31 (2005).

409 105. Stanke, M. et al. AUGUSTUS: ab initio prediction of alternative transcripts.  
410 *Nucleic Acids Res.* **34**, W435-W439 (2006).

411 106. Korf, I. Gene finding in novel genomes. *BMC bioinformatics* **5**, 59 (2004).

412 107. Kim, D., Langmead, B., & Salzberg, S. L. HISAT: a fast spliced aligner  
413 with low memory requirements. *Nature Methods* **12**, 357 (2015).

414 108. Perteza, M. et al. StringTie enables improved reconstruction of a  
415 transcriptome from RNA-seq reads. *Nature biotechnol.* **33**, 290 (2015).

416 109. Zdobnov, E. M., & Apweiler, R. InterProScan—an integration platform for  
417 the signature-recognition methods in InterPro. *Bioinformatics* **17**, 847-848 (2001).

- 
- 418 110. Yeats, C. et al. Gene3D: modelling protein structure, function and evolution.  
419 *Nucleic Acids Res.* **34**, D281-D284 (2006).
- 420 111. Gough, J. The SUPERFAMILY database in structural genomics. *Acta*  
421 *Crystallographica Section D: Biological Crystallography* **58**, 1897-1900 (2002).
- 422 112. Mistry, J., & Finn, R. Pfam: a domain-centric method for analyzing proteins  
423 and proteomes. *Comparative Genomics* **396**, 43-58 (2007).
- 424 113. Schultz, J. et al. SMART, a simple modular architecture research tool:  
425 identification of signaling domains. *Proc. Natl. Acad. Sci. USA* **95**, 5857-5864 (1998).
- 426 114. Hulo, N. et al. The PROSITE database. *Nucleic Acids Res.* **34**, D227-D230  
427 (2006).
- 428 115. Ashburner, M. et al. Gene ontology: tool for the unification of biology. The  
429 Gene Ontology Consortium. *Nat. Genet.* **25**, 25-29 (2000).
- 430 116. Lowe, T. M., & Eddy, S. R. tRNAscan-SE: a program for improved  
431 detection of transfer RNA genes in genomic sequence. *Nucleic Acids Res.* **25**, 955-964  
432 (1997).
- 433 117. Nawrocki, E. P., Kolbe, D. L., & Eddy, S. R. Infernal 1.0: inference of RNA  
434 alignments. *Bioinformatics* **25**, 1335-1337 (2009).
- 435 118. Griffiths-Jones, S. et al. Rfam: an RNA family database. *Nucleic Acids Res.*  
436 **31**, 439-441 (2003).
- 437 119. International Brachypodium Initiative. Genome sequencing and analysis of  
438 the model grass *Brachypodium distachyon*. *Nature* **463**, 763 (2010).
- 439 120. Tuskan, G. A et al. The genome of black cottonwood, *Populus trichocarpa*

---

440 (Torr. & Gray). *Science* **313**, 1596-1604 (2006).

441 121. Magallón, S., Hilu, K. W., & Quandt, D. Land plant evolutionary timeline:  
442 gene effects are secondary to fossil constraints in relaxed clock estimation of age and  
443 substitution rates. *J. Exp. Bot.* **100**, 556-573 (2013).

444 122. Pua, E. C. et al. Malate synthase gene expression during fruit ripening of  
445 Cavendish banana (*Musa acuminata* cv. Williams). *J. Exp. Bot.* **54**, 309-316 (2003).

446 123. Li, R. et al. SOAP: short oligonucleotide alignment program.  
447 *Bioinformatics* **24**, 713-714 (2008).

448

449

450

451

452

453

454

455

456

457

458

459

460

461

462

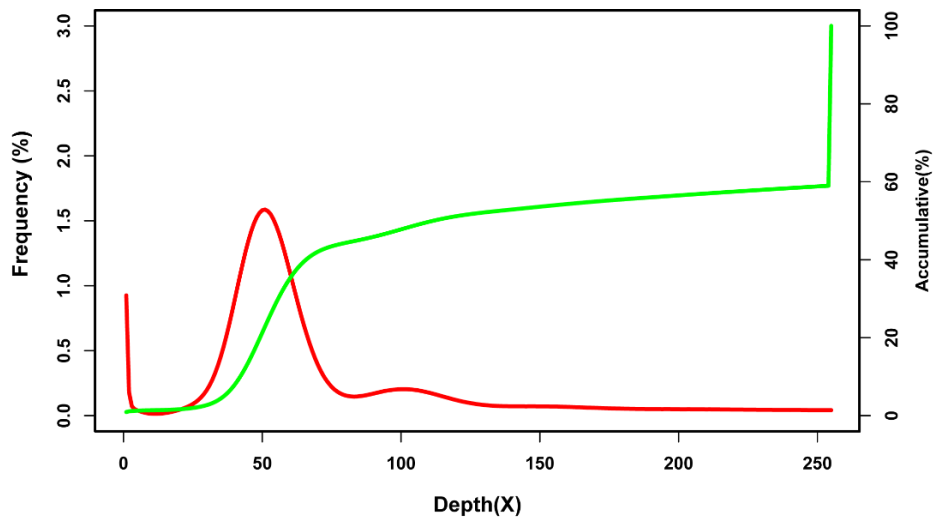

| k-mer | k-mer number   | peak depth | genome size(bp) | used bases     | used reads  | unique k-mer |
|-------|----------------|------------|-----------------|----------------|-------------|--------------|
| 17    | 25,507,921,320 | 49         | 520,569,822     | 30,366,573,000 | 303,665,730 | 271,977,289  |

463

464 **Supplementary Figure 1.** The K-mer analysis used to estimate B-genome size.

465 The frequency of 17-mers are shown representing 17 bp sequences within reads  
 466 (after filtering) from the clean reads of short-insert size libraries. The red curve shows  
 467 the K-mer frequency distribution, and the green curve shows the cumulative  
 468 distribution of K-mer frequency. Genome size is estimated as: (total K-mer number) /  
 469 (the peak depth). The estimate for genome size was 520.57 Mb.

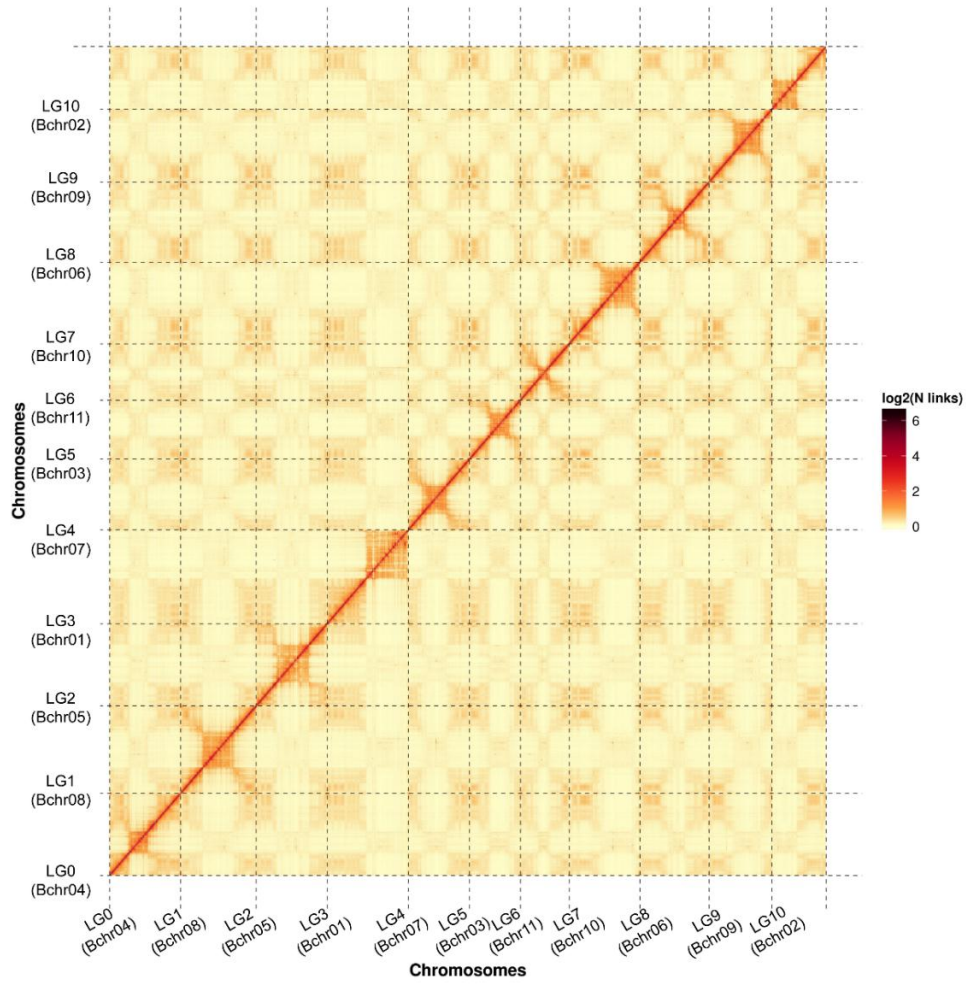

470

471 **Supplementary Figure 2.** The Hi-C chromatin interaction map for the 11

472 pseudomolecules of B-genome.

473

474



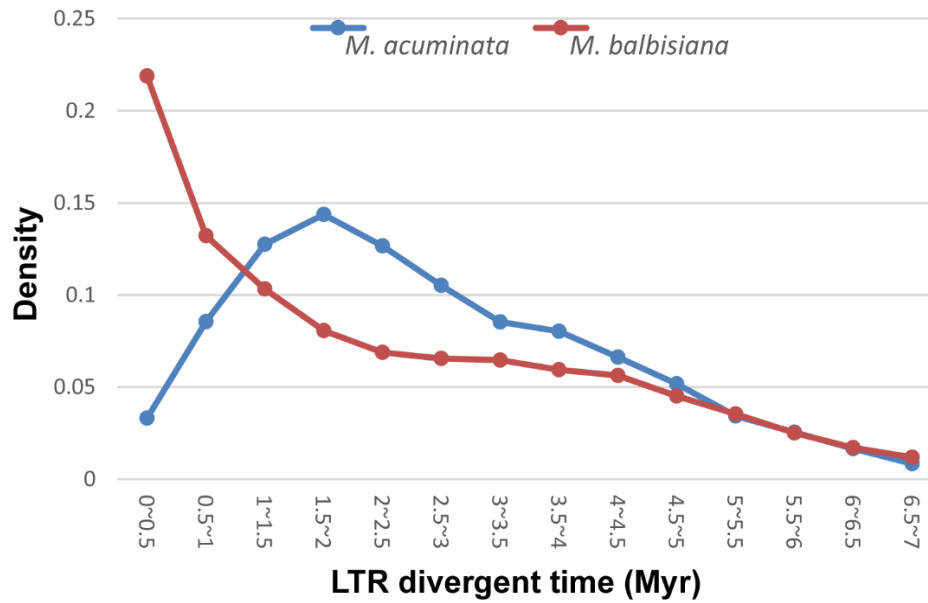

475

476

477

478

479

480

481

482

483

484

485

**Supplementary Figure 3.** Timing of LTR retrotransposon insertions. The blue line represents the LTR insertion time (million years ago) of A-genome, while the red line represents the insertion time of B-genome.

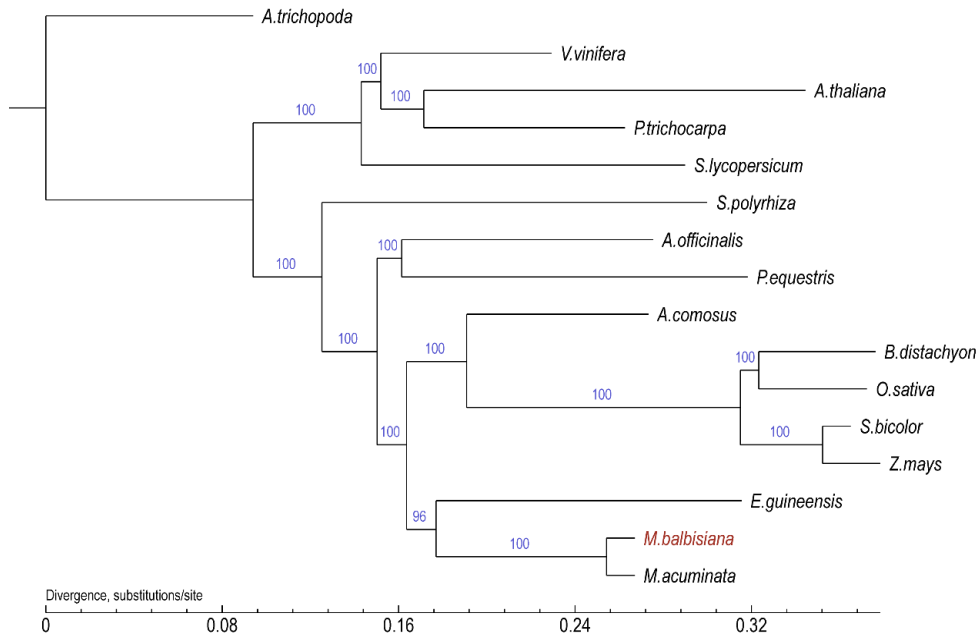

486

487

**Supplementary Figure 4.** Phylogenetic tree on the basis of single-copy

488 orthologous genes shared among *M. acuminata*, *M. balbisiana* and 14 other plant

489 species.

490

491

492

493

494

495

496

497

498

499

500

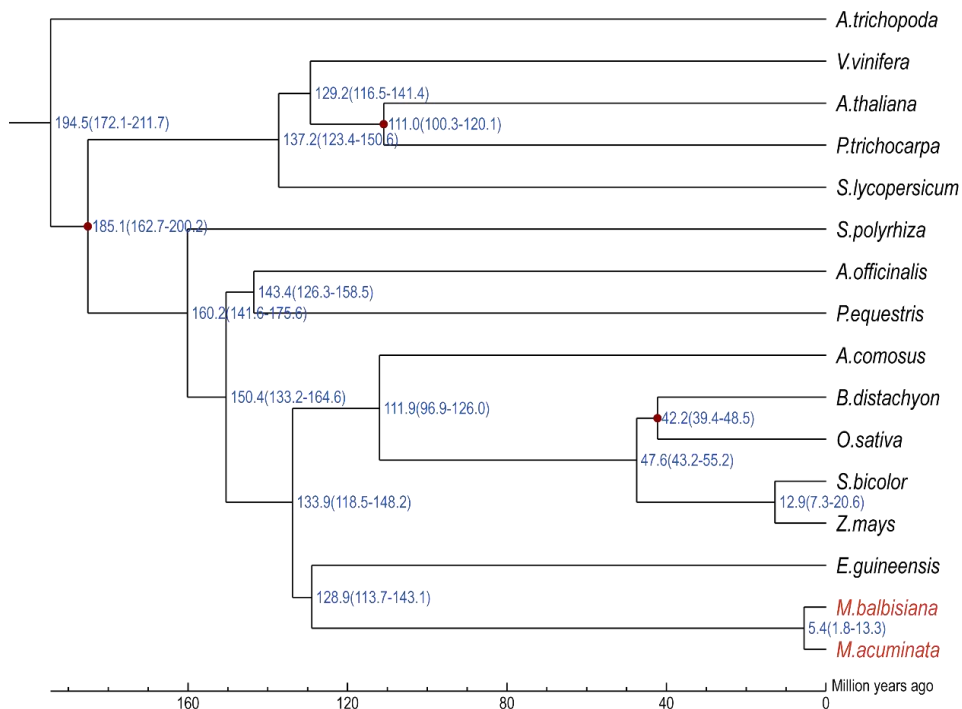

501

502 **Supplementary Figure 5.** Estimation of the divergence time of the B-genome

503 with 15 other species based on orthologous relationships.

504 Blue numbers at the nodes are divergence time to present (MYA). Red dots

505 represent the calibration time of *B. distachyon*-*O. sativa* and *A. thaliana*-*P.*

506 *trichocarpa* that were derived from the previously analysis.

507

508

509

510

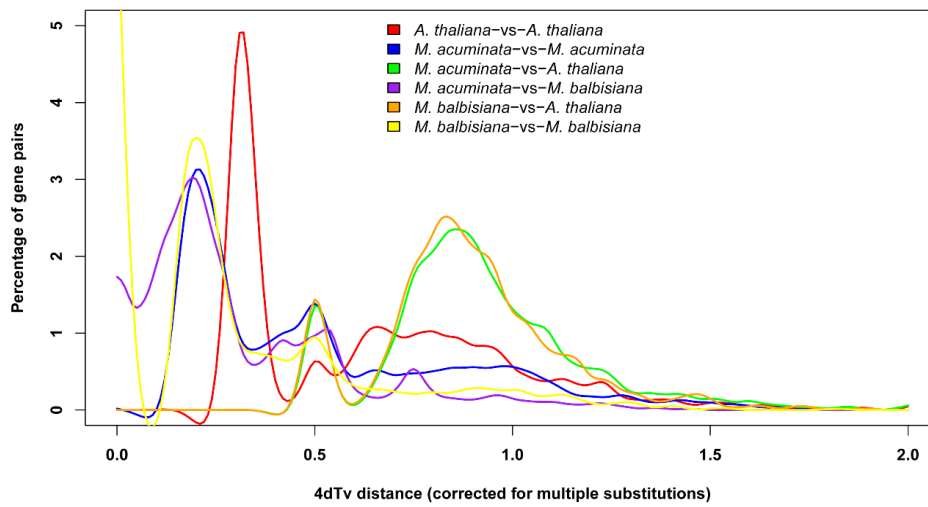

**Supplementary Figure 6.** Distribution of the 4dTv distance between duplicated genes in syntenic blocks among *M. acuminata*, *M. balbisiana* and *A. thaliana*.

The purple and yellow line represents the 4dTv distribution of A-genome and B-genome respectively.

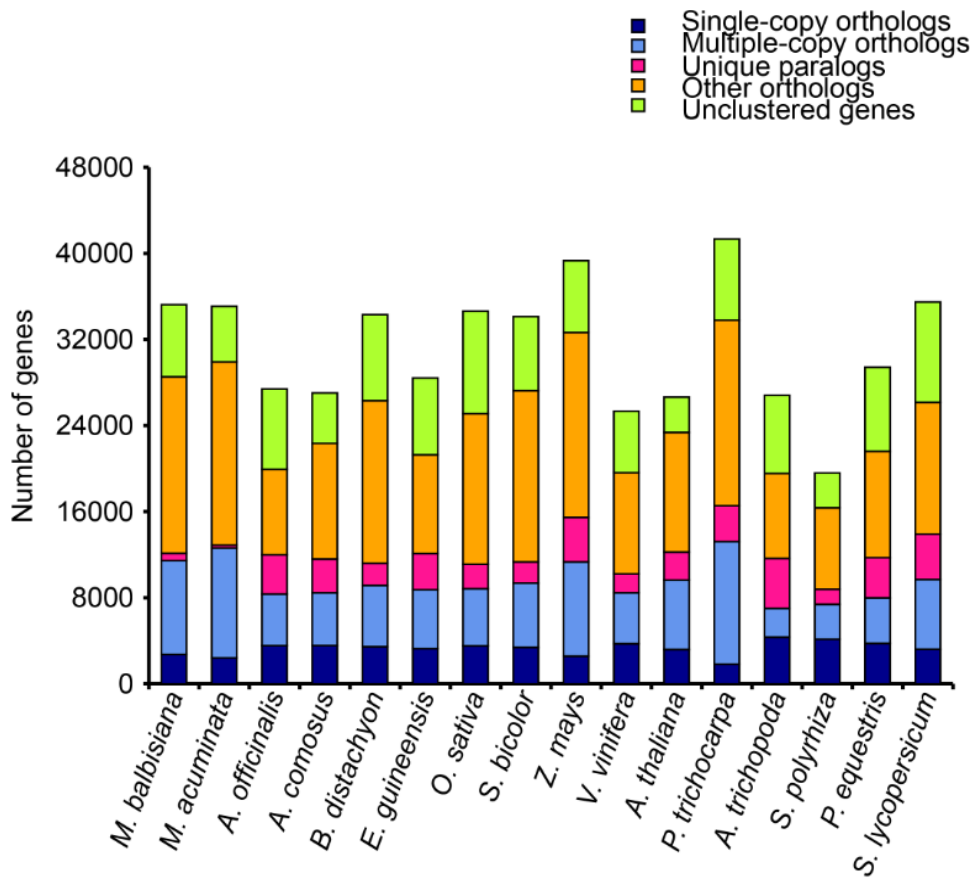

523

524

**Supplementary Figure 7.** Gene numbers in each category that were defined by

525

OrthoMCL.

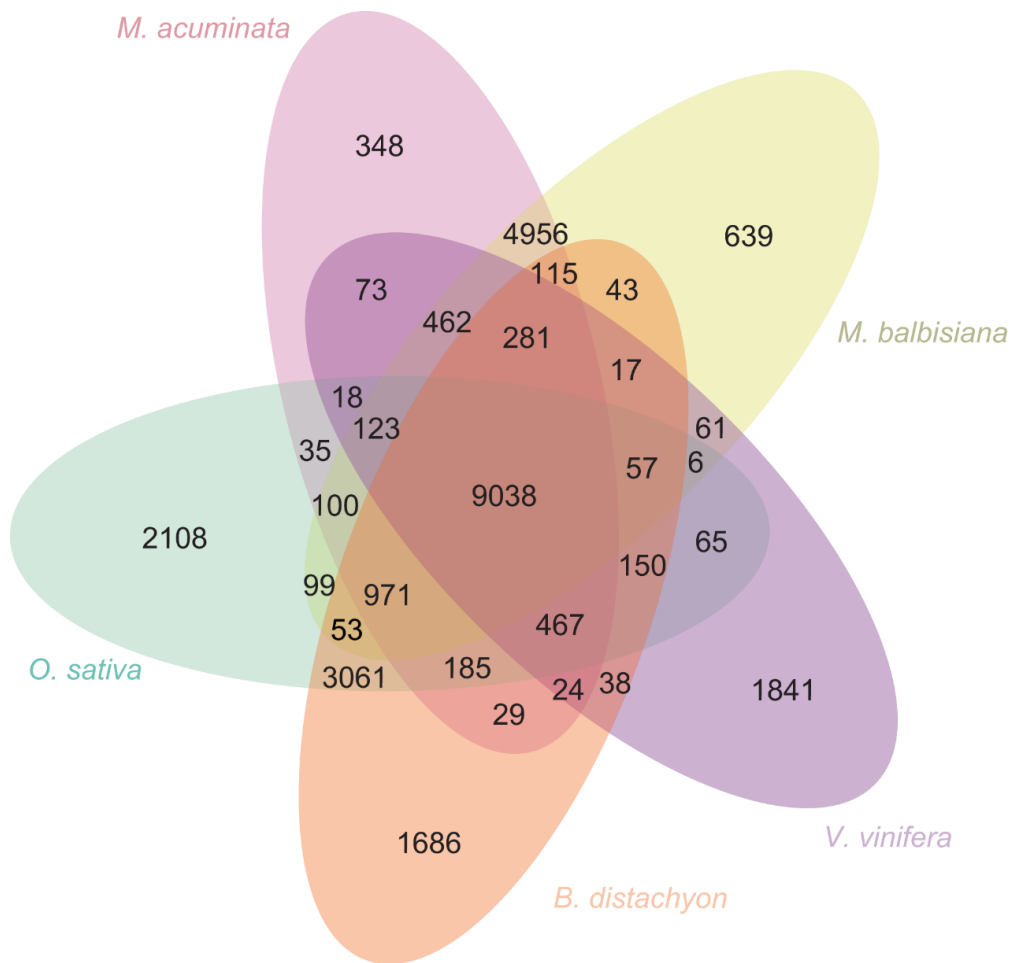

526

527 **Supplementary Figure 8.** Venn diagram showing the shared orthologous groups

528 among *M. balbisiana*, *M. acuminata*, *O. sativa*, *B. distachyon*, and *V. vinifera*.

529 The number within the circles indicates the number of gene families in each

530 cluster.

531

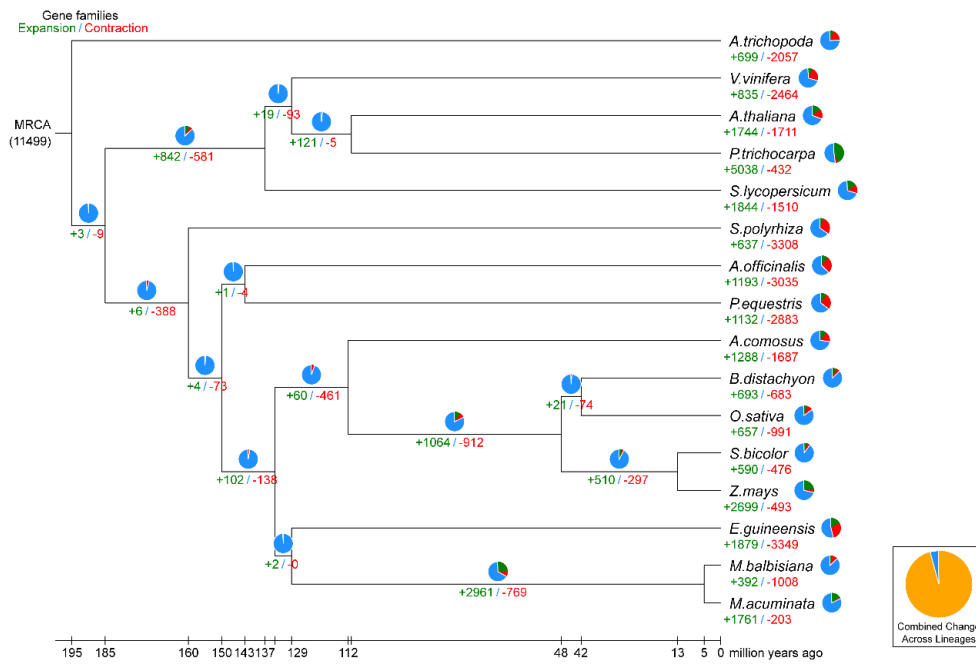

532

533

**Supplementary Figure 9. Phylogenetic relationship and the expansion and**

534

contraction of gene families.

535

Gene family expansions are indicated in green, and gene family contractions are

536

indicated in red. The corresponding proportions among the total changes are shown as

537

pie charts using the same colors. Blue portions of the pie charts represent conserved

538

gene families.

539

540

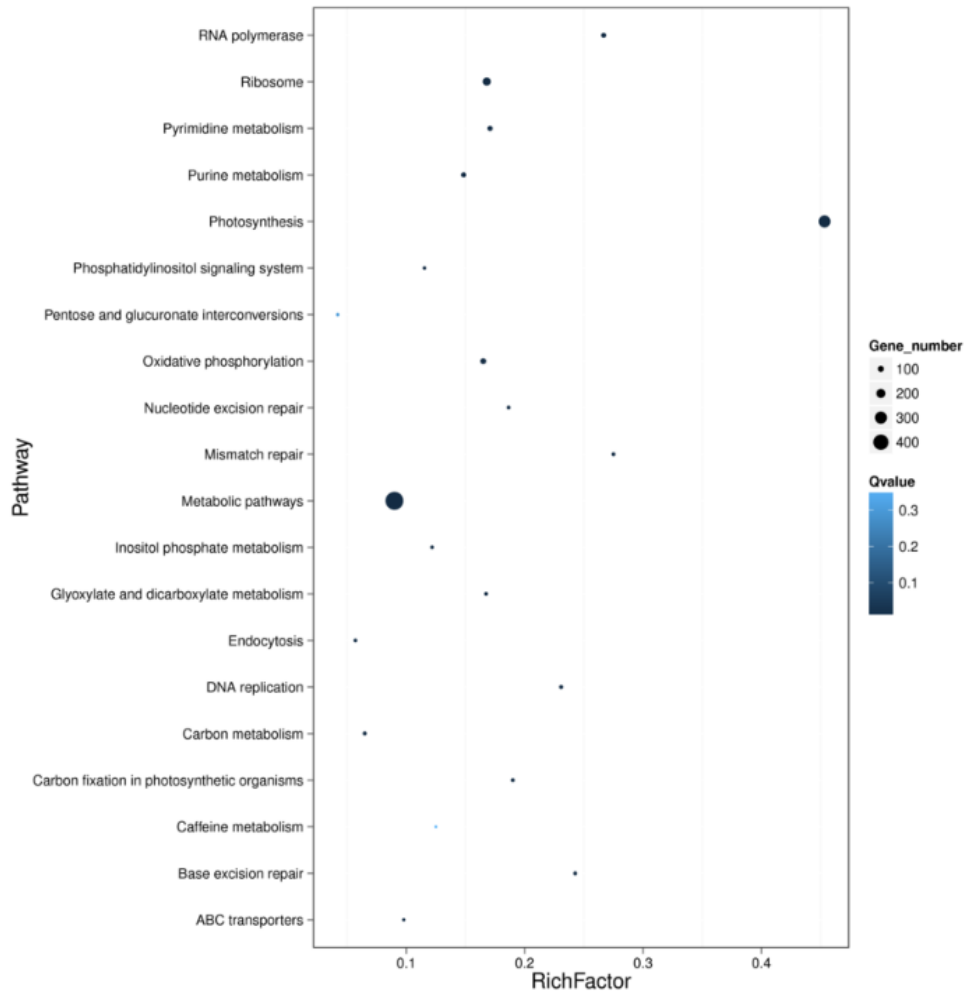

541

542 **Supplementary Figure 10.** The KEGG pathway enrichment analysis of the  
 543 significantly expanded gene families in the B-genome. A total of 757 (sample size)  
 544 genes were used in enrichment analysis. The gene set enrichment was analyzed using  
 545 hypergeometric testing. Q-value was calculated using FDR (False Discovery Rate)  
 546 adjustment method for correcting multiple hypothesis testing.

547 Top 20 pathways are shown. Q-values represent the significance of enrichment.

548 Circles indicates the target genes, and the size is proportional to the number of genes.



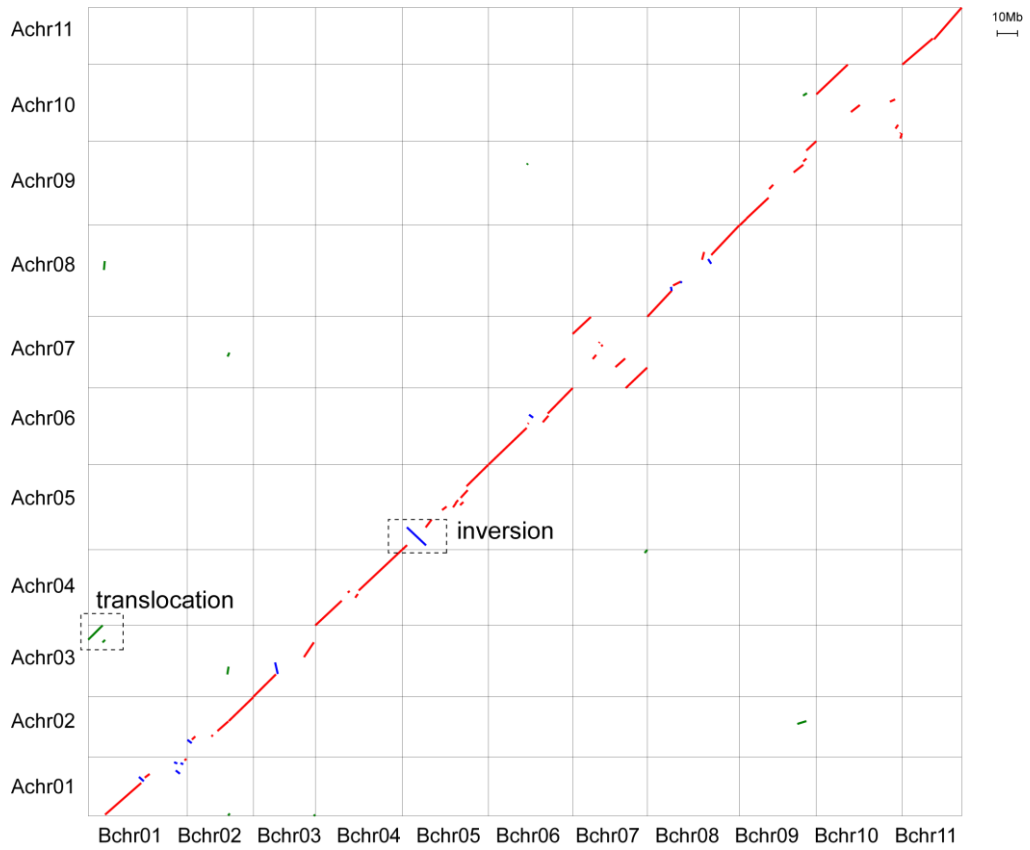

549

550

551 **Supplementary Figure 11.** Syntenic relationship between *M. balbisiana* and *M.*  
 552 *acuminata* genomes.

553 The relationship of the chromosomes between the two species are shown. Red  
 554 line represents alignment blocks, blue line represents inversion and green line  
 555 represents translocation blocks.

556

557

558

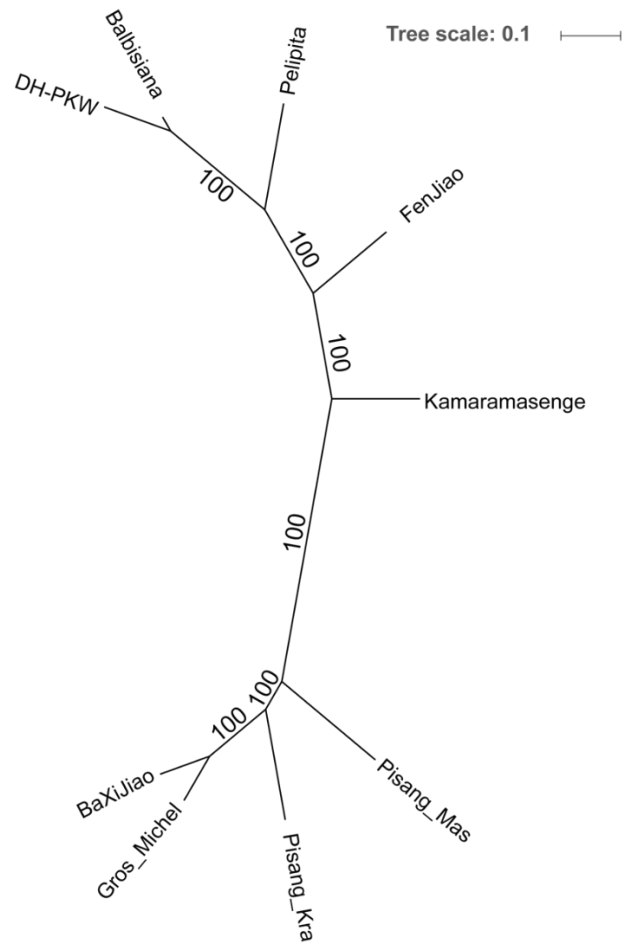

559

560

561 **Supplementary Figure 12.** Phylogenetic relationships of the nine resequenced

562 banana accessions based on genotyping data.

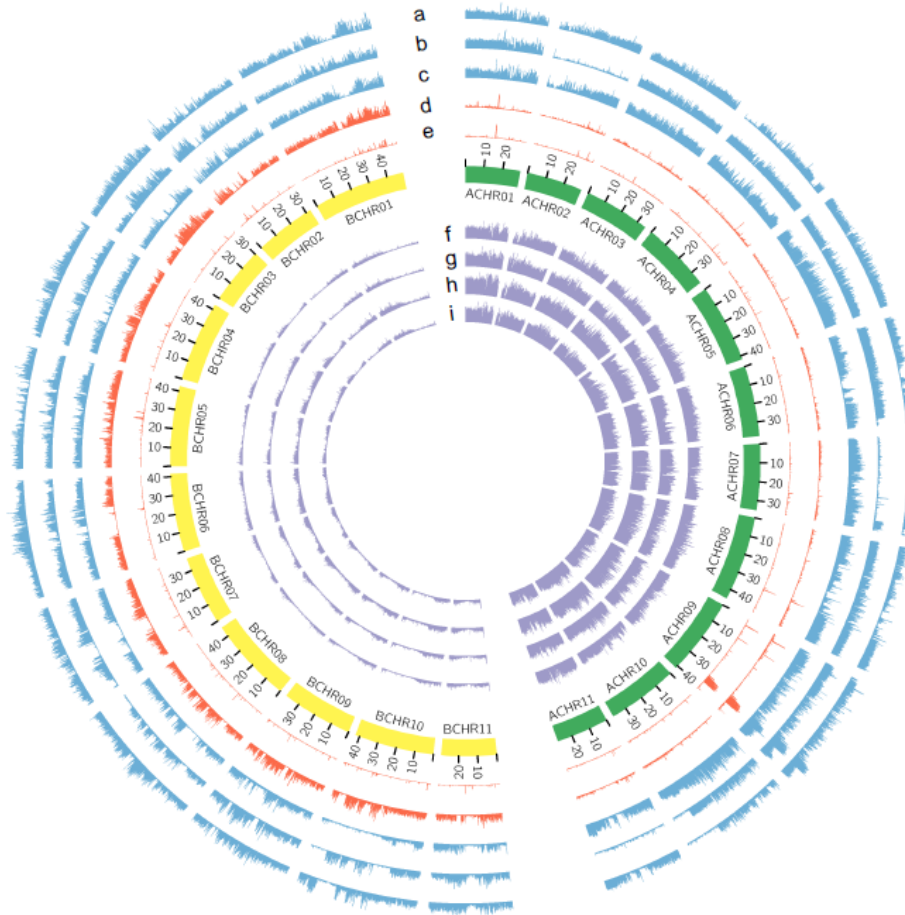

563

564

**Supplementary Figure 13.** The SNP density distributions with 50-kb non

565

overlapping sliding windows of the nine resequencing samples on A- and B-genome

566

(*M. acuminata* and *M. balbisiana*). The samples are represents as follows : a: Fen Jiao

567

(genome group: ABB), b: Pelipita (genome group: ABB), c: Kamaramasenge (genome

568

group: AAB), d: Balbisiana (genome group: BB), e: DH\_PKW (genome group: BB), f:

569

Pisang Kra (genome group: AA), g: Pisang Mas (genome group: AA), h: Gros\_Michel

570

(genome group: AAA), i: BaXiJiao (genome group: AAA).

571

572

573

574

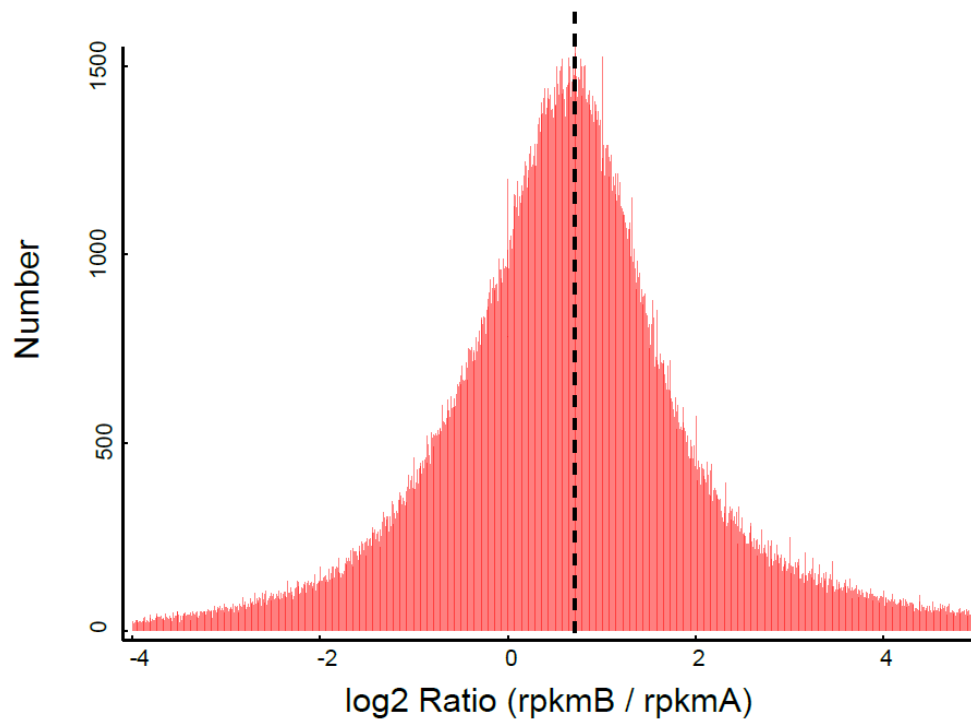

575

576

**Supplementary Figure 14.** The  $\log_2$  (RPKM B / RPKM A) expression

577

distribution of all homoeologous gene pairs between A- and B-subgenomes in FJ.

578

579

580

581

582

583

584

585

586

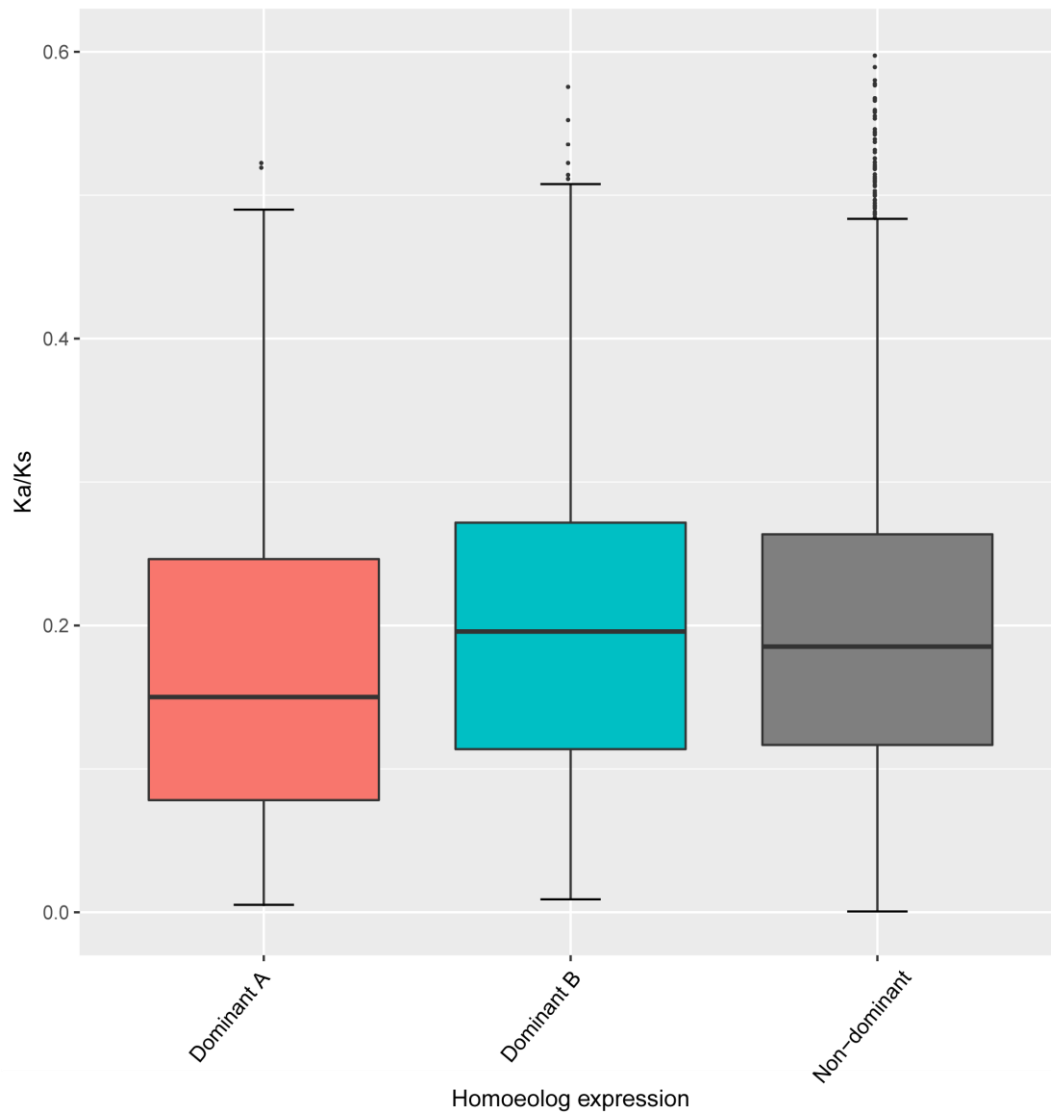

587

588 **Supplementary Figure 15.** Box plots of Ka/Ks values of homoeologs pairs with  
 589 expression dominance in FJ. The minima, maxima, centre, upper and lower quartiles  
 590 were shown in the figure.

591 There are 243, 1,777 and 7,804 homoeologs pairs with expression dominance in  
 592 A-subgenome, B-subgenome, and non-expression dominance respectively, and they  
 593 are defined as Dominant A, Dominant B, and Non-dominant, respectively.

594

595

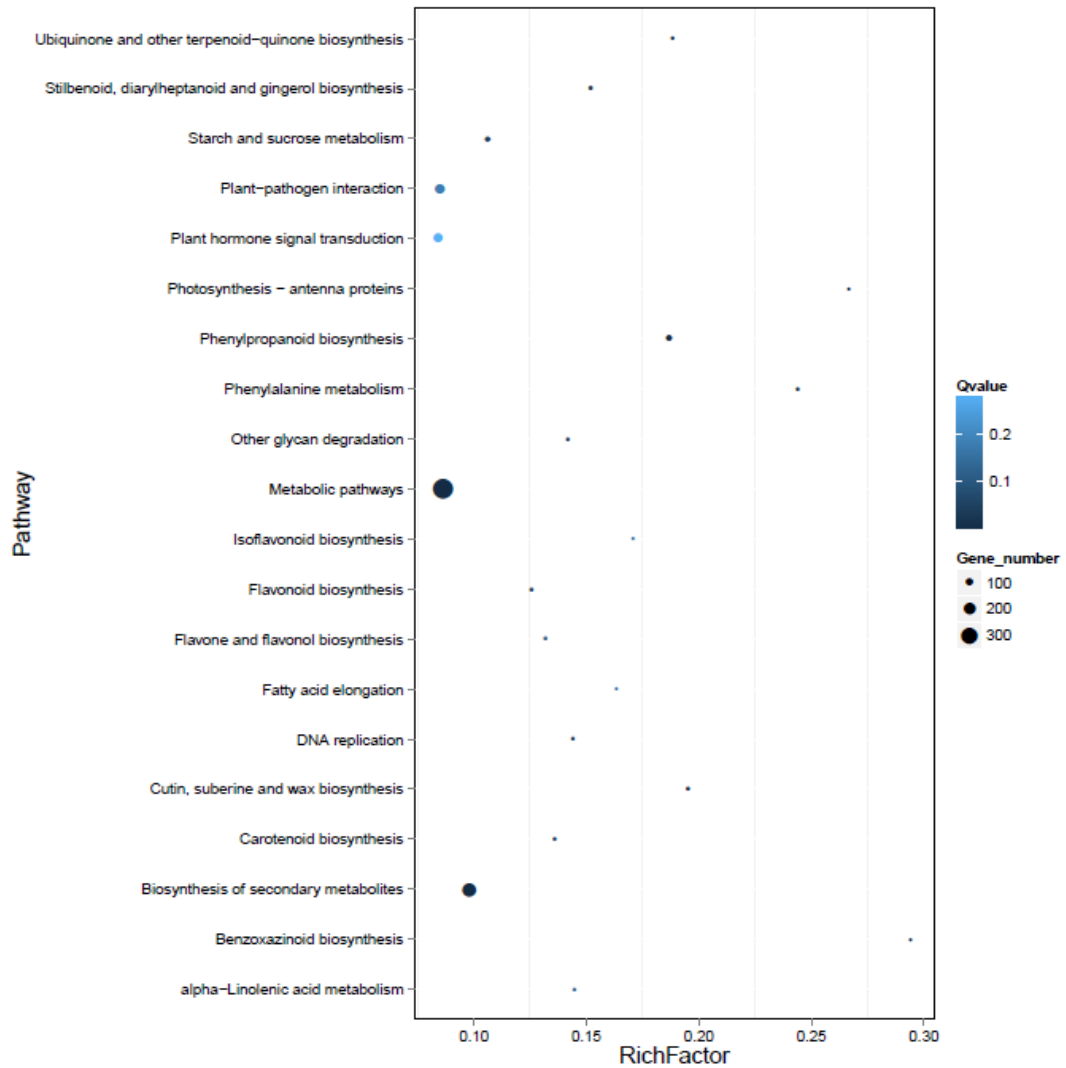

596

597

**Supplementary Figure 16.** KEGG pathway enrichment analysis for the genes in

598

the co-expression network of the A-subgenome. A total of 1,418 (sample size) genes

599

were used in enrichment analysis. The gene set enrichment was analyzed using

600

hypergeometric testing. Q-value was calculated using FDR (False Discovery Rate)

601

adjustment method for correcting multiple hypothesis testing.

602

The top 20 pathways were shown. Q-values represent the significance of

603

enrichment. Circles indicate the target genes and the size is proportional to the

604

number of genes.

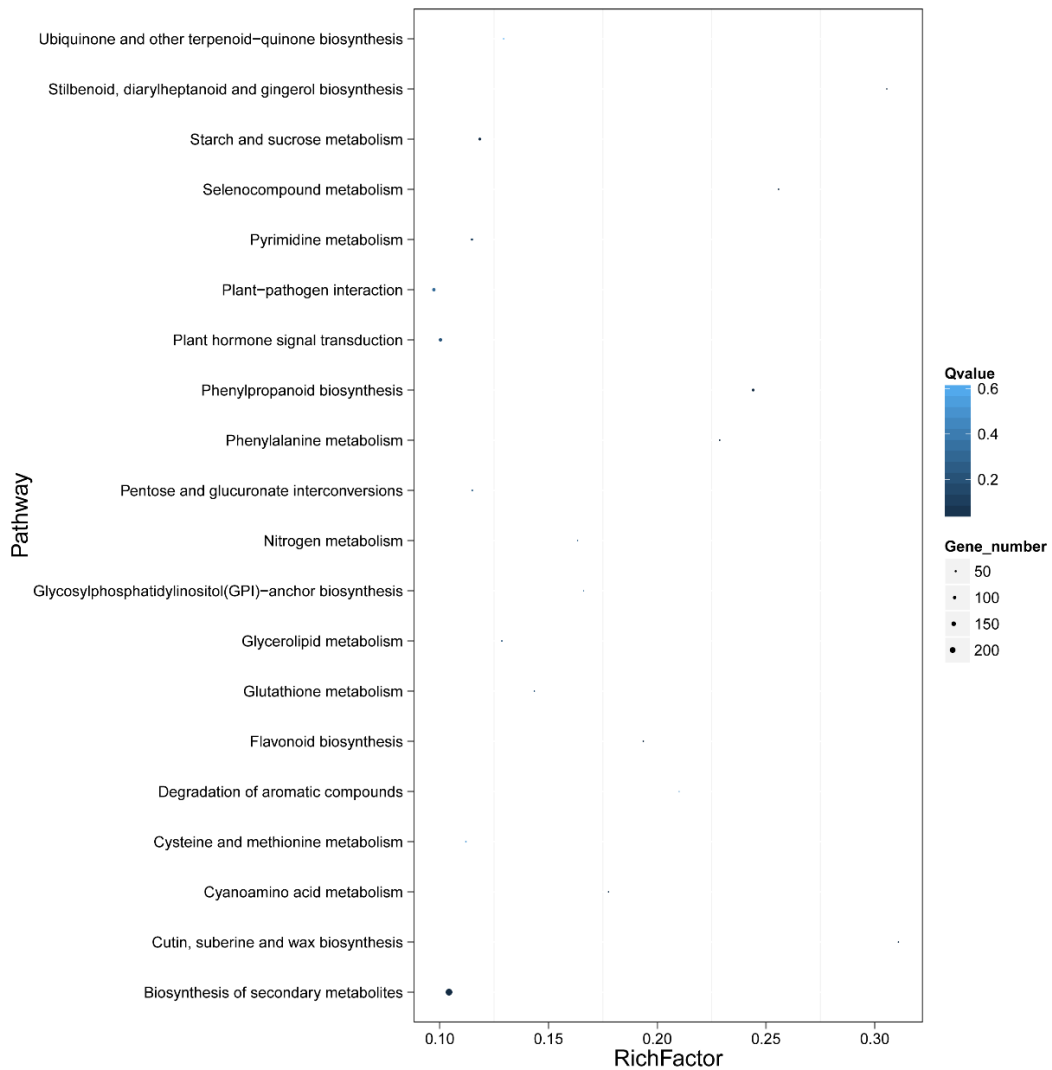

605

606 **Supplementary Figure 17.** KEGG pathway enrichment analysis for the genes in

607 the co-expression network of the B subgenome. A total of 2,028 (sample size) genes

608 were used in enrichment analysis. The gene set enrichment was analyzed using

609 hypergeometric testing. Q-value was calculated using FDR (False Discovery Rate)

610 adjustment method for correcting multiple hypothesis testing.

611 The top 20 pathways were shown. Q-values represent the significance of

612 enrichment. Circles indicate the target genes and the size is proportional to the

613 number of genes.

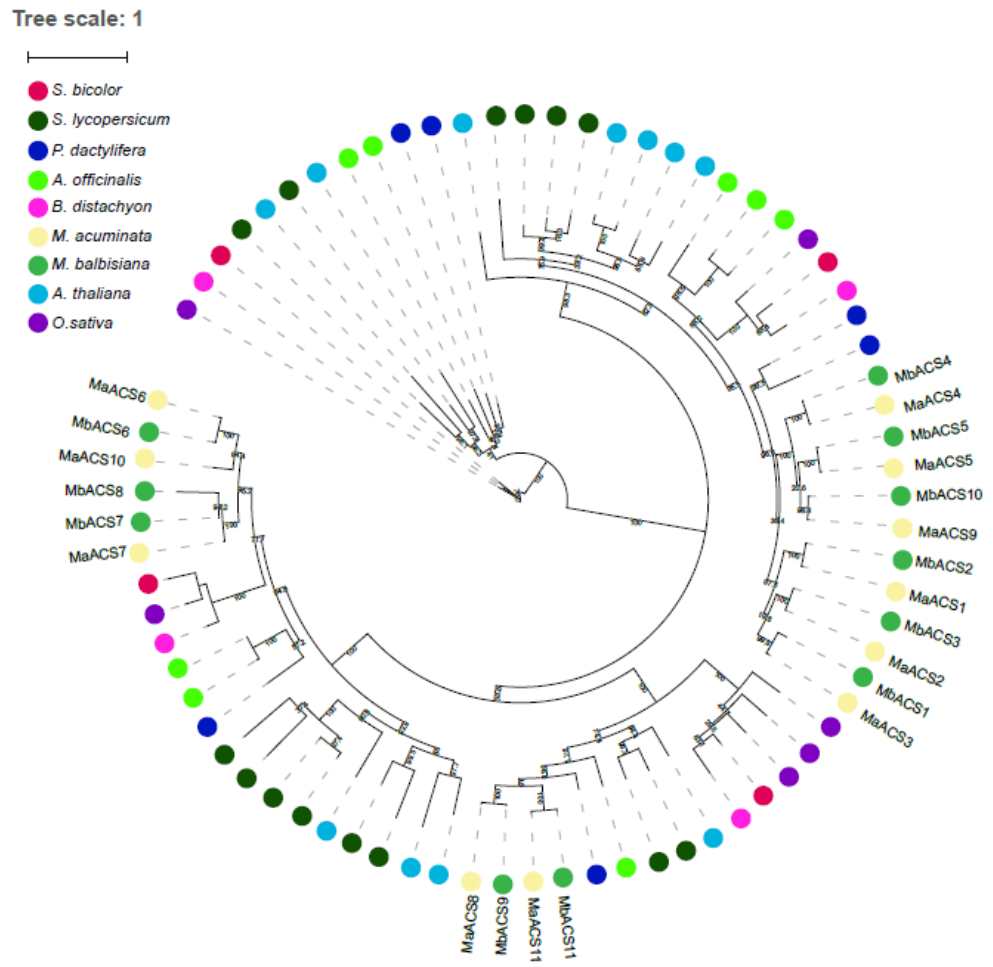

615

616

**Supplementary Figure 18.** Phylogenetic analysis of the ACS gene family

617

among nine species.

618



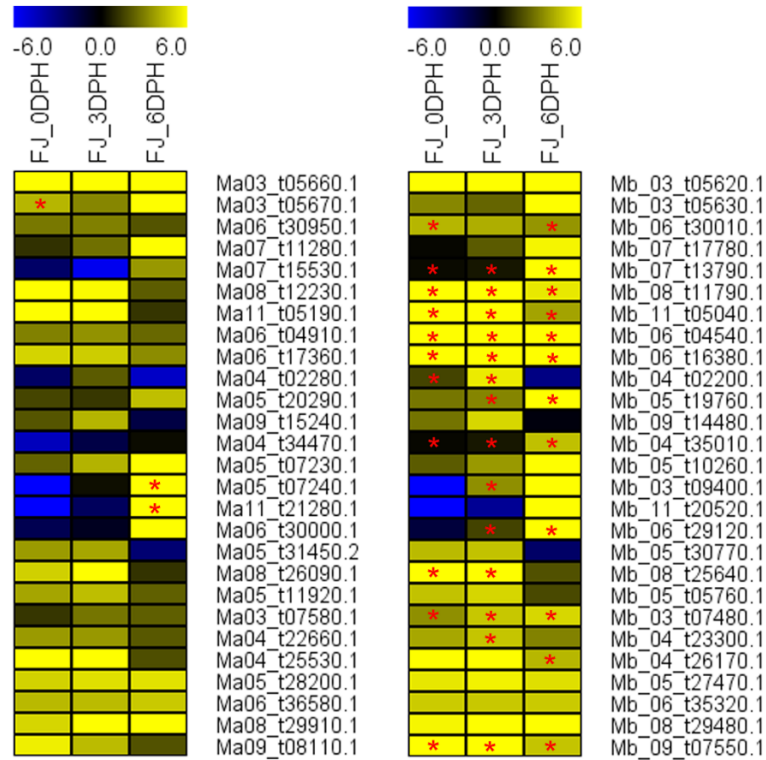

619

620

**Supplementary Figure 19.** The expression dominance (Log2 based RPKM) of

621

homoeolog gene pairs that are related to fruit ripening between the A- and B-

622

subgenomes of FJ.

623

Horizontal genes in the heat map indicate homologous gene pairs between the A-

624

and B-subgenomes. Asterisks indicate the dominant homoeolog expression between

625

the A- and B-subgenomes of FJ. Days post-harvest (DPH) are fruit ripening stages.

626

627

628

629

630

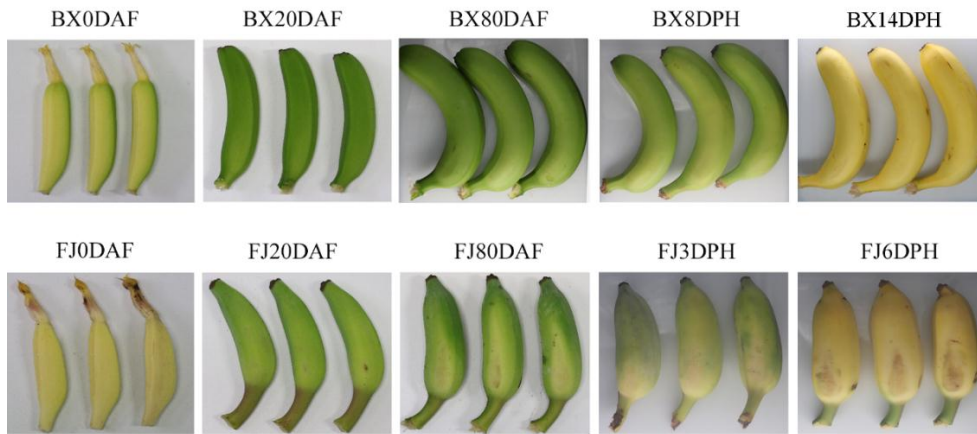

631

632 **Supplementary Figure 20.** Phenotype of BX and FJ at different stages of fruit

633 development and ripening. DAF, days after flower; DPH, days postharvest. The

634 experiment was repeated three times independently with similar results.

635

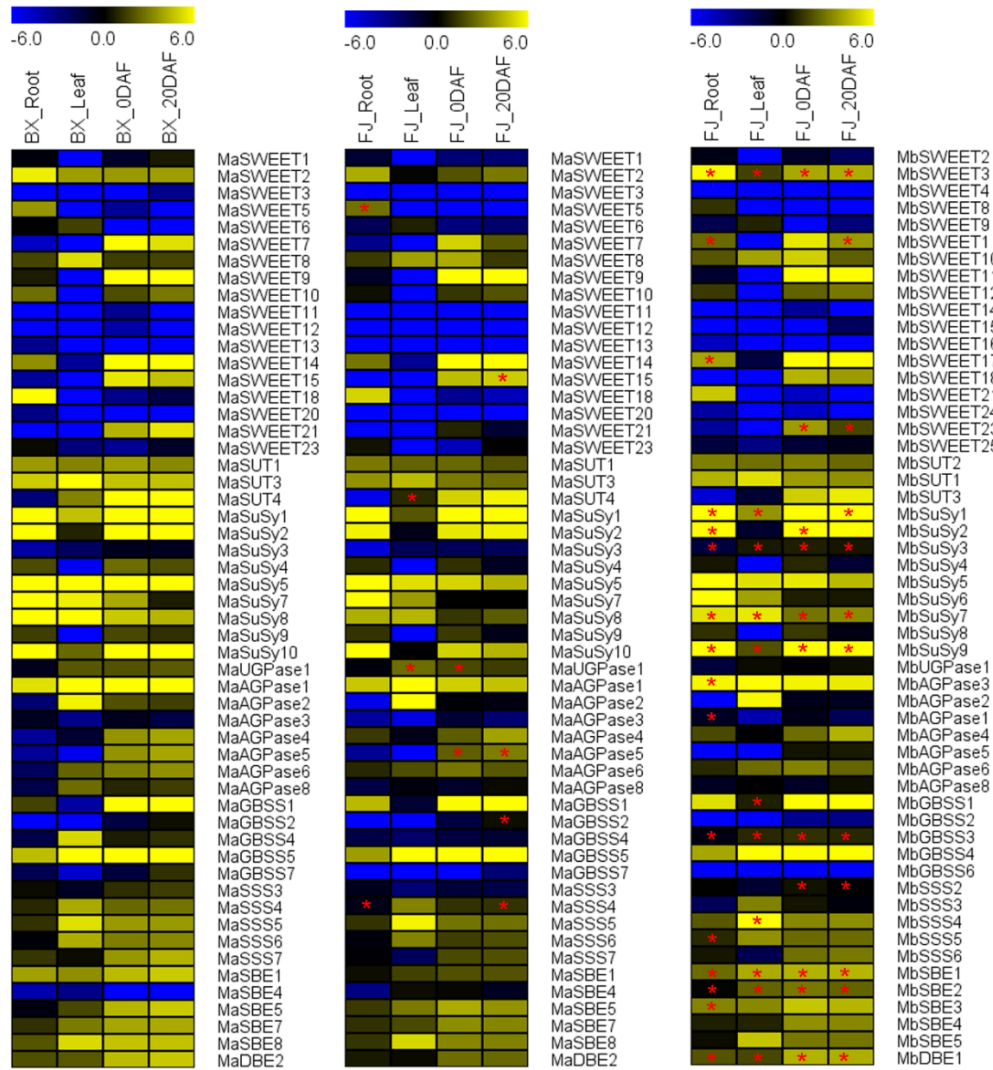

636

637 **Supplementary Figure 21.** The expression dominance (Log2 based RPKM) of  
 638 homoeolog gene pairs that are related to starch synthesis pathway within the roots,  
 639 leaves, and fruits between the A- and B-subgenomes of FJ.

640 Horizontal genes in the heat map indicate homoeolog gene pairs between the A-  
 641 and the B-subgenomes. Asterisks indicate the dominant homoeolog expression  
 642 between the A- and B-subgenomes of FJ. DAF, days after flowering.

643

644

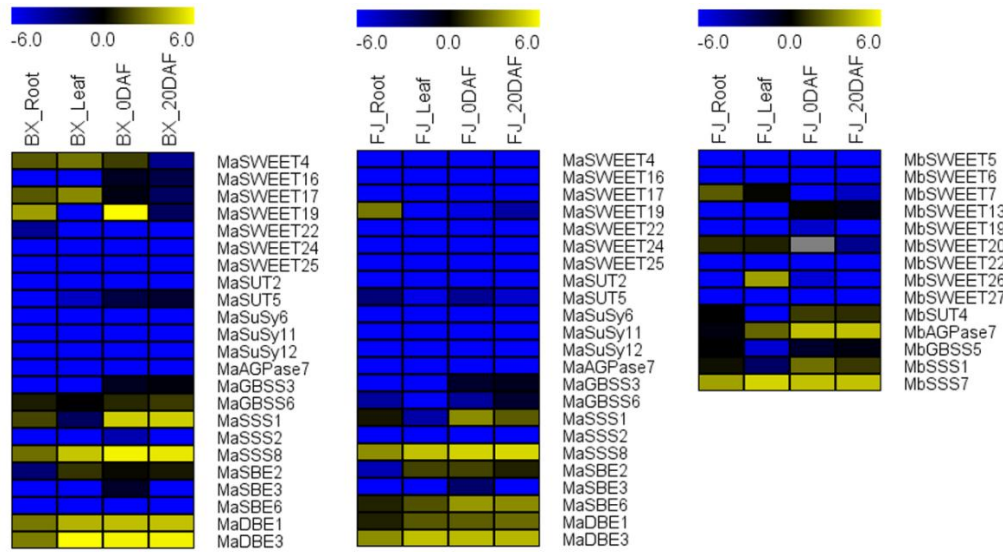

645

646

**Supplementary Figure 22.** Expression patterns (Log2 based RPKM) of genes in

647

the starch synthesis pathway unique to the A- or B- genomes within the roots, leaves,

648

and fruits.

649

650

651

652

653

654

655

656

657

658

659

660

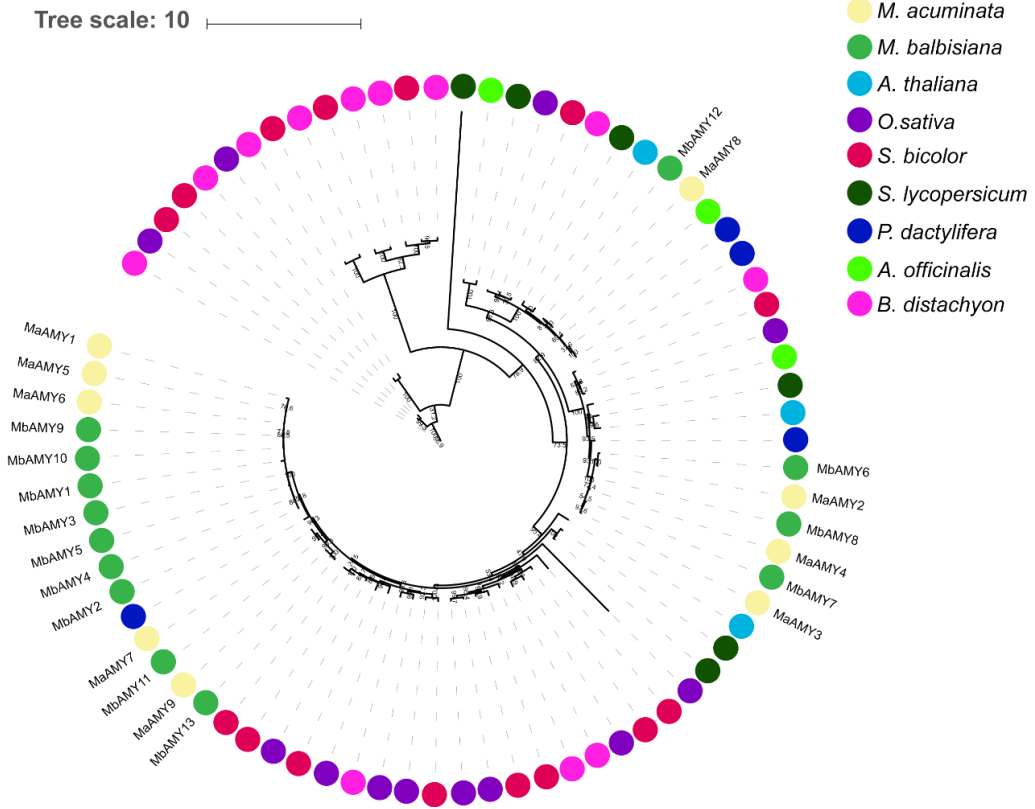

661

662 **Supplementary Figure 23.** Phylogenetic analysis of the AMY gene family

663 among nine species.

664

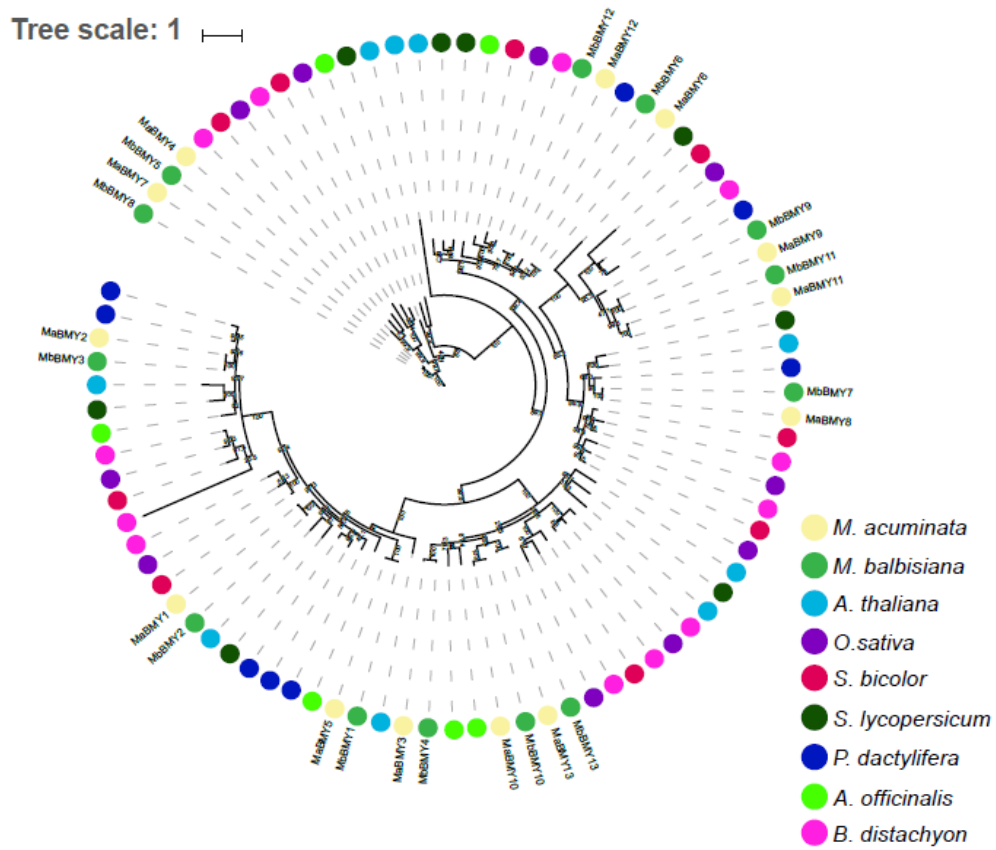

665

666 **Supplementary Figure 24.** Phylogenetic analysis of the BMY gene family

667 among nine species.

668

669

670

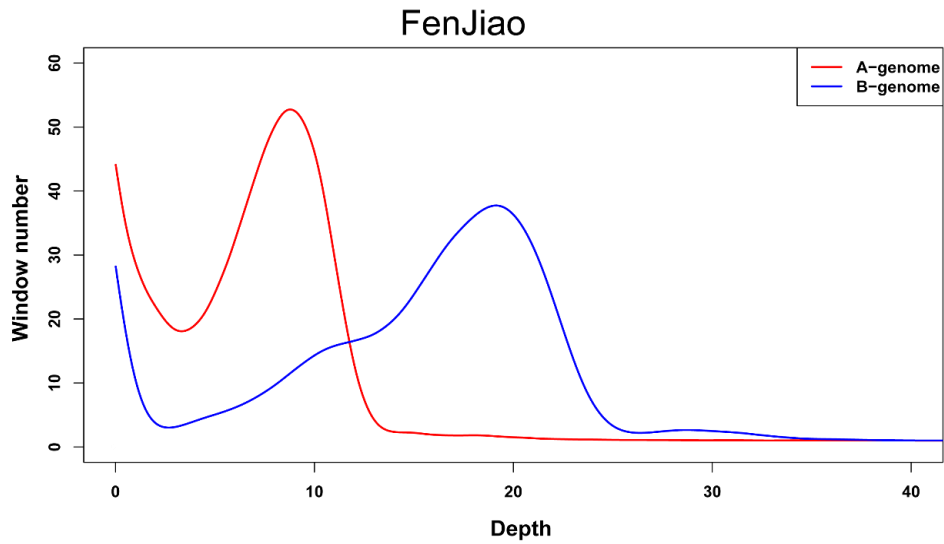

671

672

**Supplementary Figure 25.** Depth distributions for 10-kb non overlapping

673

sliding windows in FenJiao (genome group: ABB). The red line represents the depth

674

of A-subgenome and blue line represents the depth of B-subgenome.

675

676

677

678

679

680

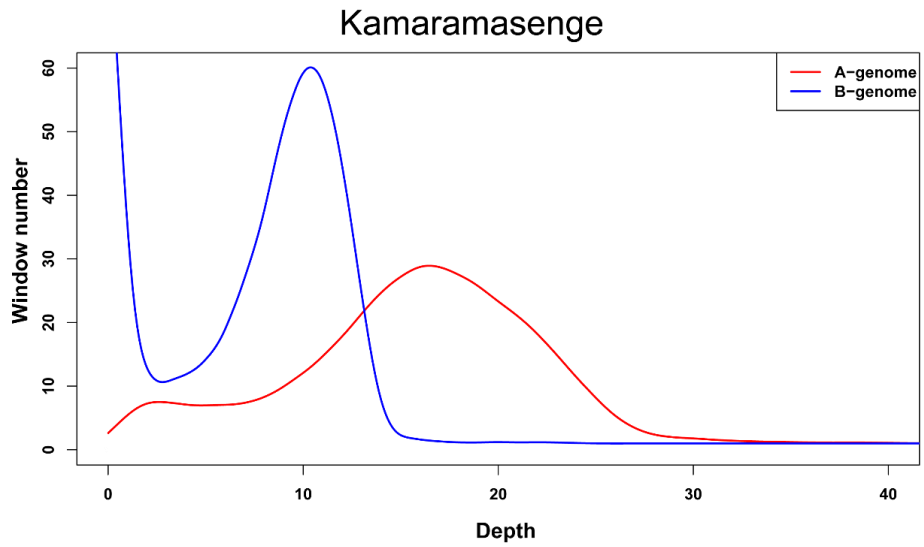

681

682

**Supplementary Figure 26.** Depth distributions for 10-kb non overlapping

683

sliding windows in Kamaramasenge (genome group: AAB). The red line represents

684

the A subgenome and the blue line represents the B subgenome.

685

686

687

688

689

690



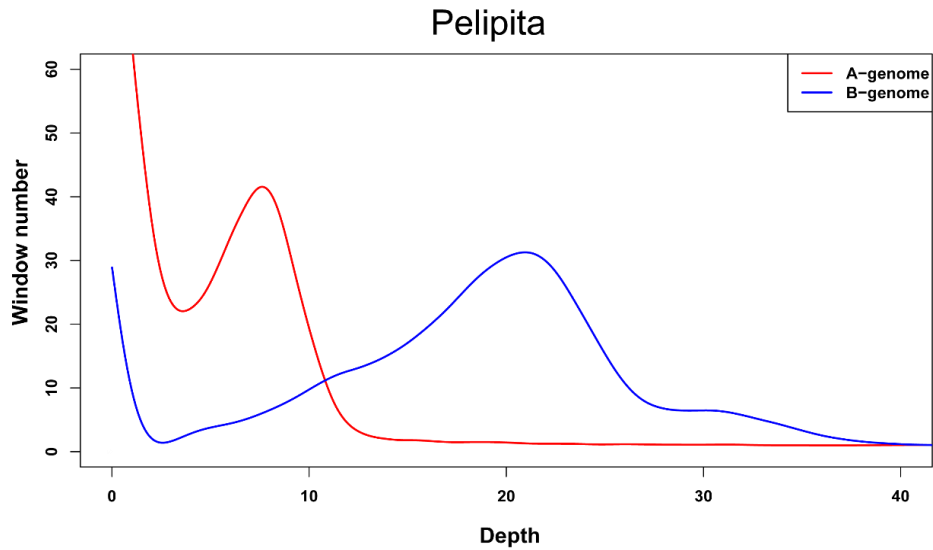

691

692

**Supplementary Figure 27.** Depth distributions for 10-kb non overlapping

693

sliding windows in Pelipita (genome group: ABB). The red line represents the A

694

subgenome and the blue line represents the B subgenome.

695

696 **Supplementary Tables**

697

Supplementary Table 1. Overview of sequencing data in *Musa balbisiana* (DH-PKW).

698

Supplementary Table 2. Overview of genome assembly of *Musa balbisiana*.

699

(DH-PKW) and *Musa acuminata*.

700

Supplementary Table 3. Overview of assembly anchoring on the 11 pseudo-molecules

701

of *Musa balbisiana* and *Musa acuminata*.

702

Supplementary Table 4. Statistics of repeat contents in the assembled B-genome (*M.*

703

*balbisiana*) and A-genome (*M. acuminata*).

704

Supplementary Table 5. General statistics of predicted protein-coding genes.

705

Supplementary Table 6. Transcription factor families in 7 plant genomes.

706

Supplementary Table 7. Gene families in 16 plant genomes.

---

707 Supplementary Table 8. The statistics of gene family expansion in A-genome.

708 Supplementary Table 9. The statistics of gene family expansion in B-genome.

709 Supplementary Table 10. KEGG enrichment analysis of the significantly expanded  
710 gene families in B-genome using hypergeometric test.

711 Supplementary Table 11. Syntenic blocks between *M. balbisiana* and *M. acuminata*  
712 and among other species.

713 Supplementary Table 12. The synteny statistics of *M. balbisiana* and *M. acuminata* to  
714 12 ancestral blocks.

715 Supplementary Table 13. Banana accessions used for resequencing analysis.

716 Supplementary Table 14. Statistics of banana resequencing data.

717 Supplementary Table 15. Homeologous exchanges in the three triploid samples.

718 Supplementary Table 16. Summary of SNPs identified in resequencing accessions.

719 Supplementary Table 17. Summary of Indels identified in resequencing accessions.

720 Supplementary Table 18. Summary of SVs identified in resequencing accessions.

721 Supplementary Table 19. KEGG pathway enrichment of the 83 gene families that are  
722 significantly expanded in the A-genome (and conversely contracted in the B-genome)  
723 using hypergeometric test.

724 Supplementary Table 20. KEGG pathway enrichment of the 33 gene families that are  
725 significantly expanded in the B-genome (and conversely contracted in the A-genome)  
726 using hypergeometric test.

727 Supplementary Table 21. Statistics of samples used for RNA-Seq sequencing.

728 Supplementary Table 22. Homoeolog gene pairs between *M. acuminata* and *M.*

---

729 *balbisiana*.

730 Supplementary Table 23. Expression dominance of homoeolog gene pairs in A  
731 subgenome/ B subgenome of triploid FJ.

732 Supplementary Table 24. KEGG enrichment analysis of the genes with expression  
733 dominance in the B-subgenome using hypergeometric test.

734 Supplementary Table 25. KEGG pathway enrichment of the genes which interacted  
735 with expression dominance genes of A-subgenome using hypergeometric test.

736 Supplementary Table 26. KEGG pathway enrichment of genes which interacted with  
737 expression dominance genes of B-subgenome using hypergeometric test.

738 Supplementary Table 27. The name and accession number of the genes related to  
739 ethylene biosynthesis in A- and B-genome.

740 Supplementary Table 28. The number of genes related to ethylene biosynthesis in  
741 various species.

742 Supplementary Table 29. Homoeolog gene pairs related to ethylene biosynthesis  
743 between A and B-genome.

744 Supplementary Table 30. The expression data (Log2 based RPKM) of the genes  
745 related to ethylene biosynthesis in BX variety.

746 Supplementary Table 31. The expression data (Log2 based RPKM) of the genes  
747 related to ethylene biosynthesis in A subgenome of FJ variety.

748 Supplementary Table 32. The expression data (Log2 based RPKM) of the genes  
749 related to ethylene biosynthesis in B subgenome of FJ variety.

750 Supplementary Table 33. Expression data of 28 homoeolog gene pairs related to fruit

---

751 ripening between A- and B-subgenome in 7 samples (each sample has two replicates)  
752 of FJ variety.

753 Supplementary Table 34. Overview of homoeolog gene pairs expressin dominance  
754 related to fruit ripening between A- and B-subgenome in FJ variety.

755 Supplementary Table 35. Synteny analysis of ACO genes between *M. acuminata* and  
756 *M. balbisiana*.

757 Supplementary Table 36. The expression data (Log2 based RPKM) of homoeolog gene  
758 pairs related to fruit ripening between A- and B-subgenome in FJ variety.

759 Supplementary Table 37. Overview of homoeolog gene pairs related to fruit ripening  
760 between A- and B-subgenome in FJ variety.

761 Supplementary Table 38. The expression data (Log2 based RPKM) of the ACO genes  
762 expanded in B-subgenome of FJ variety.

763 Supplementary Table 39. The name and accession number of the genes related to  
764 starch metabolism in A- and B-genomes.

765 Supplementary Table 40. The number of genes related to starch metabolism in various  
766 species.

767 Supplementary Table 41. The expression data (Log2 based RPKM) of the genes  
768 related to starch biosynthesis in BX variety.

769 Supplementary Table 42. The expression data (Log2 based RPKM) of the genes  
770 related to starch biosynthesis in A-subgenome of FJ variety.

771 Supplementary Table 43. The expression data (Log2 based RPKM) of the genes  
772 related to starch biosynthesis in B-subgenome of FJ variety.

---

773 Supplementary Table 44. Expression data of 54 homoeolog gene pairs related to  
774 starch biosynthesis between A- and B-subgenomes in 4 samples (each sample has two  
775 replicates) of FJ variety.

776 Supplementary Table 45. Overview of homoeolog gene pairs express in dominance  
777 related to starch biosynthesis between A- and B-subgenomes in FJ variety.

778 Supplementary Table 46. The expression data (Log2 based RPKM) of the genes  
779 related to starch degradation in BX variety.

780 Supplementary Table 47. The expression data (Log2 based RPKM) of the genes  
781 related to starch degradation in A-subgenome of FJ variety.

782 Supplementary Table 48. The expression data (Log2 based RPKM) of the genes  
783 related to starch degradation in B-subgenome of FJ variety.

784 Supplementary Table 49. Expression data of 21 homoeolog gene pairs related to  
785 starch degradation between A- and B-subgenomes in 3 samples (each sample has two  
786 replicates) of FJ variety.

787 Supplementary Table 50. Overview of homoeolog gene pairs expression dominance  
788 related to starch degradation between A-and B-subgenomes.

789 Supplementary Table 51. Genes of ethylene biosynthesis and starch metabolism in  
790 various species used for homolog-based prediction.

791 Supplementary Table 52. Non-coding RNA annotation of *M. balbisiana*.

792

793

794
